# Supplementary material for: Factors influencing early and late readmissions in Australian hospitalised patients and investigating role of admission nutrition status as a predictor of hospital readmissions: a cohort study
Source: PubMed Central journal article supplement — BMJ Open. 2018 Jun 27;8(6):e022246. doi: 10.1136/bmjopen-2018-022246 (PMC6020977; doi:10.1136/bmjopen-2018-022246), 2018-06-27
Supplement: bmjopen-2018-022246.draft_revisions.pdf [file bmjopen-2018-022246.draft_revisions.pdf]

# BMJ Open

BMJ Open is committed to open peer review. As part of this commitment we make the peer review history of every article we publish publicly available.

When an article is published we post the peer reviewers' comments and the authors' responses online. We also post the versions of the paper that were used during peer review. These are the versions that the peer review comments apply to.

The versions of the paper that follow are the versions that were submitted during the peer review process. They are not the versions of record or the final published versions. They should not be cited or distributed as the published version of this manuscript.

BMJ Open is an open access journal and the full, final, typeset and author-corrected version of record of the manuscript is available on our site with no access controls, subscription charges or pay-per-view fees (<http://bmjopen.bmj.com>).

If you have any questions on BMJ Open's open peer review process please email [info.bmjopen@bmj.com](mailto:info.bmjopen@bmj.com)

# BMJ Open

## Factors influencing early and late readmissions in Australian hospitalised patients and investigating role of admission nutrition status as a predictor of hospital readmissions: a cohort study

|                               |                                                                                                                                                                                                                                                                                                                                                                                                                                                                                                                                             |
|-------------------------------|---------------------------------------------------------------------------------------------------------------------------------------------------------------------------------------------------------------------------------------------------------------------------------------------------------------------------------------------------------------------------------------------------------------------------------------------------------------------------------------------------------------------------------------------|
| Journal:                      | <i>BMJ Open</i>                                                                                                                                                                                                                                                                                                                                                                                                                                                                                                                             |
| Manuscript ID                 | bmjopen-2018-022246                                                                                                                                                                                                                                                                                                                                                                                                                                                                                                                         |
| Article Type:                 | Research                                                                                                                                                                                                                                                                                                                                                                                                                                                                                                                                    |
| Date Submitted by the Author: | 08-Feb-2018                                                                                                                                                                                                                                                                                                                                                                                                                                                                                                                                 |
| Complete List of Authors:     | Sharma, Yogesh; Flinders Medical Centre, General Medicine<br>Miller, Michelle; Flinders University Faculty of Medicine Nursing and Health Sciences, Nutrition & Dietetics<br>Kaambwa, Billingsley; Flinders University Faculty of Medicine Nursing and Health Sciences, Health Economics<br>Shahi, Rashmi; Flinders University Faculty of Medicine Nursing and Health Sciences<br>Hakendorf, Paul; Flinders Medical Centre<br>Horwood, Chris; Flinders Medical Centre<br>Thompson, Campbell; University of Adelaide, Discipline of Medicine |
| Keywords:                     | Quality in health care < HEALTH SERVICES ADMINISTRATION & MANAGEMENT, INTERNAL MEDICINE, NUTRITION & DIETETICS, EPIDEMIOLOGY, Health & safety < HEALTH SERVICES ADMINISTRATION & MANAGEMENT                                                                                                                                                                                                                                                                                                                                                 |
|                               |                                                                                                                                                                                                                                                                                                                                                                                                                                                                                                                                             |

SCHOLARONE™  
Manuscripts

1  
2  
3 **Factors influencing early and late readmissions in Australian hospitalised**  
4 **patients and investigating role of admission nutrition status as a predictor of**  
5 **hospital readmissions: a cohort study**  
6  
7  
8

9 Yogesh Sharma<sup>1</sup>, Michelle Miller<sup>2</sup>, Billingsley Kaambwa<sup>3</sup>, Rashmi Shahi<sup>4</sup>, Paul Hakendorf<sup>6</sup>, Chris Horwood<sup>6</sup>,  
10 Campbell Thompson<sup>7</sup>  
11  
12  
13

14 **Author Affiliations**  
15

16  
17  
18  
19 Dr Yogesh Sharma

20  
21 Consultant Physician

22  
23 Department of General Medicine

24  
25 Flinders Medical Centre, South Australia

26  
27 College of Medicine and Public Health

28  
29 Flinders University, South Australia

30  
31 Tel. +61 8 82046694

32  
33 Fax: +61 8 82046255

34  
35 Email: [Yogesh.Sharma@sa.gov.au](mailto:Yogesh.Sharma@sa.gov.au)  
36  
37  
38  
39

40  
41 Prof Michelle Miller

42  
43 Department of Nutrition & Dietetics

44  
45 Flinders University, South Australia

46  
47 Tel: 08 72218855

48  
49 Fax: 08 82046408

50  
51 Email: [michelle.miller@flinders.edu.au](mailto:michelle.miller@flinders.edu.au)  
52  
53  
54  
55

56 Assoc Prof Billingsley Kaambwa  
57  
58  
59  
60

1  
2  
3 Health Economics Unit

4  
5 Flinders University, South Australia

6  
7 Tel: +61 8 8201 5377

8  
9 Fax: +61 8 8275 5377

10  
11 billingsley.kammbwa@flinders.edu.au

12  
13  
14  
15  
16 Dr Rashmi Shahi

17  
18 Faculty of Health Sciences

19  
20 Flinders University, South Australia

21  
22 Tel. +61423156984

23  
24 Fax: 08 82046408

25  
26 Email: shah0103@flinders.edu.au

27  
28  
29  
30  
31 Paul Hakendorf

32  
33 Clinical Epidemiologist

34  
35 Department of Clinical Epidemiology

36  
37 Flinders Medical Centre, South Australia

38  
39 Tel: +61 8 8204 3950

40  
41 Email: paul.hakendorf@sa.gov.au

42  
43  
44  
45  
46 Chris Horwood

47  
48 Clinical Epidemiologist

49  
50 Department of Clinical Epidemiology

51  
52 Flinders Medical Centre, South Australia

53  
54 Tel: +61 8 82043179

1  
2  
3 Email: [chris.horwood@sa.gov.au](mailto:chris.horwood@sa.gov.au)  
4

5 Prof Campbell Thompson  
6

7 Discipline of Medicine  
8

9 University of Adelaide, South Australia  
10

11 Tel: +61 8 70740231  
12

13 Email: [campbell.thompson@adelaide.edu.au](mailto:campbell.thompson@adelaide.edu.au)  
14  
15

16  
17  
18 **Corresponding Author**  
19

20  
21  
22 Dr Yogesh Sharma  
23

24 Consultant Physician  
25

26 Department of General Medicine  
27

28 Flinders Medical Centre, South Australia  
29

30 College of Medicine and Public Health  
31

32 Flinders University, South Australia  
33

34 Tel. +61 8 82046694  
35

36 Fax: +61 8 82046255  
37

38 Email: [Yogesh.Sharma@sa.gov.au](mailto:Yogesh.Sharma@sa.gov.au)  
39  
40

41  
42  
43  
44 Word count: 2507  
45  
46  
47  
48  
49  
50  
51  
52  
53  
54  
55  
56  
57  
58  
59  
60

## Abstract

**Objectives:** Limited studies have identified predictors of early and late hospital readmissions in Australian healthcare settings. Some of these predictors may be modifiable through targeted interventions. A recent study has identified malnutrition as a predictor of readmissions in older patients but this has not been verified in a larger population. This study investigated what predictors are associated with early and late readmissions and determined whether nutrition status during index hospitalization can be used as a modifiable predictor of unplanned hospital readmissions.

**Design:** A retrospective cohort study

**Setting:** Two tertiary-level hospitals in Australia

**Participants:** All medical admissions  $\geq 18$  years over a period of 1-year

**Outcomes:** Primary objective was to determine predictors of early (0-7 days) and late (8-180 days) readmissions. Secondary objective was to determine whether nutrition status as determined by malnutrition universal screening tool (MUST) can be used to predict readmissions.

**Results:** There were 11,750 (44.8%) readmissions within 6-months, with 2,897 (11%) early and 8,853 (33.8%) late readmissions. MUST was completed in 16.2% patients and prevalence of malnutrition during index admission was 31%. Malnourished

1  
2  
3 patients had a higher risk of both early (OR 1.39, 95% CI 1.12-1.73) and late  
4 readmissions (1.23, 95% CI 1.06-1.28). Weekend discharges were less likely to be  
5 associated with both early (OR 0.81, 95% CI 0.74-0.91) and late readmissions (OR  
6 0.91, 95% CI 0.84-0.97). Indigenous Australians had a higher risk of early  
7 readmissions while those living alone had a higher risk of late readmissions. Patients  
8  
9  
10  
11  
12  
13  
14  
15  
16  
17  
18  
19  
20  
21  
22  
23  
24  
25  
26  
27  
28  
29  
30  
31  
32  
33  
34  
35  
36  
37  
38  
39  
40  
41  
42  
43  
44  
45  
46  
47  
48  
49  
50  
51  
52  
53  
54  
55  
56  
57  
58  
59  
60

≥80 years had a lower risk of early readmissions while admission to intensive care unit (ICU) was associated with a lower risk of late readmissions.

**Conclusions:** Malnutrition is a strong predictor of unplanned readmissions while weekend discharges are less likely to be associated with readmissions. Targeted nutrition intervention may prevent unplanned hospital readmissions.

**Trial registration:** ANZCTR N 12617001362381

### Strengths and limitations

- A large multicentre study involving 19,924 patients with 26,253 admissions.
- Readmissions to all other hospitals were captured.
- Used Cumulative incidence function (CIF) for unbiased estimation of readmissions over time.
- This study did not take into account psychiatric factors and discharge medications.
- Functional status of the patients at discharge was not determined.

## Introduction

Recent advances in medicine have led to a vast improvement in life expectancy but with increasing numbers of patients with multiple clinical problems. Although the length of hospital stay has improved and there has been a decline in the number of beds for acute patients, unplanned hospital readmissions have increased.<sup>1</sup> Hospital readmissions strain the already busy health care settings and not only increase the health care costs but also expose patients to hospitalization associated complications.<sup>2</sup> Medicare data in the US suggests that 20% of patients return to hospital within 30 days of discharge, of which 90% are unplanned admissions with the estimated cost to the extent of US\$30 billion.<sup>3</sup> Given a considerable financial burden for hospitals and adverse outcomes for patients, hospital readmissions are increasingly used as quality indicators for institution's performance benchmark with a risk of reduced reimbursements for poorly performing hospitals.<sup>4</sup>

Although numerous readmission prediction tools are available still preventing readmissions has been problematic, as the discriminative power of the available prediction tools has been modest.<sup>5</sup> Zhou et al has highlighted need for rigorous validation of the existing risk-predictive models for potentially avoidable hospital readmissions, as the performance of the existing models is inconsistent.<sup>6</sup> They have suggested that most of the models were developed based on healthcare data from the USA, which might not be applicable to patients from other settings. Furthermore, different factors may influence readmissions over different periods following hospital discharge.<sup>7</sup> Some of these factors are still unidentified and may be potentially modifiable for future targeted interventions.



1  
2  
3  
4  
5 Very few studies have determined predictors of unplanned readmissions at different  
6  
7 periods following hospital discharge in the Australian health care settings. Moreover,  
8  
9 the available studies have not captured readmissions to all other hospitals following  
10  
11 discharge.<sup>8,9</sup> A recent study has also suggested that malnutrition is a strong predictor  
12  
13 of hospital readmissions and mortality but this study included only a small sample of  
14  
15 older general medical patients in a single hospital setting.<sup>10</sup> Whether nutrition risk can  
16  
17 be used as a predictor of readmissions in a broad range of medical patients needs  
18  
19 further confirmation. This study was designed to determine predictors of hospital  
20  
21 readmissions in early and late periods following hospital discharge across all medical  
22  
23 specialties, in two major teaching hospitals in Australia and captured readmissions to  
24  
25 all other hospitals. The other aim was to determine whether admission nutrition status,  
26  
27 as determined by the Malnutrition Universal Screening Tool (MUST), can be used to  
28  
29 predict hospital readmissions.  
30  
31  
32  
33  
34

## 35 **Methods**

### 36 37 38 39 **Setting and Study population**

40  
41  
42  
43  
44 This is a retrospective study and data were collected from two large urban teaching  
45  
46 hospitals in South Australia. Ethical approval was granted by Southern Adelaide  
47  
48 Clinical Human Research Ethics Committee (SAC HREC) no. 216.17 on 4 August  
49  
50 2017 and this study was registered with Australia and New Zealand clinical trials  
51  
52 registry (ANZCTR N 12617001362381). This study included all live medical  
53  
54 admissions in Flinders Medical Centre (FMC) and Royal Adelaide Hospital (RAH)  
55  
56  
57  
58  
59  
60

1  
2  
3 from 1 January 2016 to 31 December 2016. For this study, a readmission was only  
4 counted once as a readmission, relative to the prior index admission. All subsequent  
5 admissions then re-entered the cohort as a new index admission. All elective  
6 readmissions were excluded from the dataset.  
7  
8  
9  
10

### 11 12 13 14 **Data sources**

15  
16  
17  
18 In this study, we derived our cohort and variables of interest using the hospital's  
19 central computer database. All the data in the two involved health facilities are  
20 prospectively collected as part of regular hospital operations.  
21  
22  
23  
24  
25

### 26 27 **Objectives**

28  
29  
30  
31 The primary objective for this study was to determine predictors for early  
32 readmissions, defined as readmissions within 7 days post discharge from index  
33 hospitalization while late readmissions were defined as readmissions within 8-180  
34 days post discharge. The secondary objective was to determine whether nutrition  
35 status as determined by the MUST can predict readmissions and can be used as a  
36 modifiable risk factor. Only non-elective admissions were included in this study.  
37  
38  
39  
40  
41  
42  
43  
44  
45

### 46 47 **Analysis**

### 48 49 50 **Variables of interest**

51  
52 Patients were categorized into three groups based upon the pattern of readmission: not  
53 readmitted within 180 days (base category), readmitted within 7 days of index  
54  
55  
56  
57  
58  
59  
60

1  
2  
3 admissions (early readmissions) and readmitted within 8 to 180 days after index  
4 admission (late readmissions). Patients not readmitted within 180 days were defined  
5 as the reference group for subsequent comparisons.  
6  
7  
8  
9

10  
11 Previous studies have suggested that different variables may be responsible for  
12 various stages of readmissions.<sup>11 12</sup> Variables relating to the index admission that may  
13 be associated with early readmissions include clinical instability as determined by  
14 intensive unit care (ICU) admissions, number of medical emergency response team  
15 (MET) calls, complications during admission and length of hospital stay (LOS).<sup>11 13</sup>  
16  
17 Late readmissions may be associated with markers of chronic illness burden as  
18 reflected by the Charlson comorbidity illness (CCI), social determinants of health  
19 including marital status, whether patient was living alone or with family and the  
20 socioeconomic status as determined by the composite index of relative socio-  
21 economic disadvantage (IRSD).<sup>14 15</sup> IRSD relates to the degree of area based social  
22 disadvantage based on low levels of income and education and high levels of  
23 unemployment and is provided nationally by the Australian Bureau of Statistics.<sup>16</sup>  
24  
25 Nutrition status of the participants during index admission was determined by the use  
26 of MUST.<sup>17</sup> It is a requirement that all patients admitted in the RAH and FMC are  
27 screened for malnutrition at admission using the MUST. The MUST includes a body  
28 mass index (BMI) score, a weight loss score, and an acute disease score and a total  
29 MUST score of 0 indicates low risk, 1 medium risk and  $\geq 2$  high risk of malnutrition.<sup>18</sup>  
30  
31 For this study, patients with a MUST score of 0 were classified as nourished and  
32 those with a score  $\geq 1$  were classified as malnourished.  
33  
34  
35  
36  
37  
38  
39  
40  
41  
42  
43  
44  
45  
46  
47  
48  
49  
50  
51  
52  
53  
54

## 55 **Statistical analysis**

56  
57  
58  
59  
60

1  
2  
3  
4  
5 Data were assessed for normality using skewness and kurtosis (sk) test. Continuous  
6  
7 variables are presented as mean (standard deviation; SD) while categorical variables  
8  
9 as median (interquartile range; IQR). We used multinomial polytomous logistic  
10  
11 regression to model the association between variables of interest and early and late  
12  
13 readmissions (with no readmissions within 180 days as the reference). Length of  
14  
15 hospital stay (LOS) was adjusted for in hospital mortality. The model was adjusted  
16  
17 for following covariates-age, gender and Charlson index and length of hospital stay.  
18  
19

20  
21  
22 As death is a competing risk for readmissions, the interpretation of Kaplan-Meier  
23  
24 survival curve may not be realistic in clinical practice and may overestimate the  
25  
26 incidence of readmissions over time.<sup>19</sup> Therefore, we used cumulative incidence  
27  
28 functions (CIFs) for unbiased estimation of the probability of readmissions over time  
29  
30 according to the nutrition status of the patients determined during the index  
31  
32 hospitalization.<sup>20 21</sup> Cumulative risk regression model as suggested by Fine and  
33  
34 Gray,<sup>22</sup> determined the subdistribution hazard ratio (SHR) and a CIF curve for  
35  
36 readmissions was plotted. The model was adjusted for the following covariates- age,  
37  
38 gender, Charlson comorbidity index and length of hospital stay.  
39  
40  
41  
42  
43

44 All data analyses were performed using STATA 15 (StataCorp College station, Texas,  
45  
46 USA) and a p value <0.05 was considered statistically significant.  
47  
48  
49

## 50 **Results**

51  
52  
53  
54  
55  
56  
57  
58  
59  
60

There were a total of 26,253 admissions, representing 19,924 patients, between 1<sup>st</sup> January 2016 to 31<sup>st</sup> December 2016, with 52.3% males. The overall readmission rate at 6-months was 44.8%. A total of 2,897 (11.0% of index admissions) patients were readmitted within 7 days of discharge (early readmissions) whereas 8, 853 (33.8% of index admissions) were readmitted within 8-180 days of discharge (late readmissions)(Table 1). The distribution of readmissions by post-discharge day is shown in Figure 1, with 24.7% of readmissions occurring in the early period, and 75.3% occurring late after hospital discharge. MUST was completed in 4251 (16.2%) of patients during index admission and prevalence of malnutrition according to the MUST was 31%. Majority of patients (80.5%) were discharged over the weekdays and only 19.5% discharges occurred over the weekends.

**Table 1 Initial hospitalization and patient characteristics by readmission status**

| Variable                                 | Early Readmissions<br>(0-7 days)<br>(n = 2897, 11.0%) | Late Readmissions<br>(8-180 days)<br>(n = 8853, 33.8%) | No Readmission<br>(within 180 days)<br>(n = 14503, 55.2%) |
|------------------------------------------|-------------------------------------------------------|--------------------------------------------------------|-----------------------------------------------------------|
| Age n (%)                                |                                                       |                                                        |                                                           |
| <40                                      | 305 (10.5)                                            | 863 (9.8)                                              | 1616 (11.1)                                               |
| 41- 59                                   | 664 (22.9)                                            | 1869 (21.1)                                            | 3156 (21.8)                                               |
| 60 - 79                                  | 1189 (41.0)                                           | 3525 (39.8)                                            | 5343 (36.8)                                               |
| >80                                      | 739 (25.5)                                            | 2596 (29.3)                                            | 4388 (30.3)                                               |
| Sex Male n (%)                           | 1588 (54.8)                                           | 4688 (53.0)                                            | 7528 (52.0)                                               |
| Confirmed Indigenous status<br>n (%)     | 169 (5.8)                                             | 249 (2.8)                                              | 329 (2.3)                                                 |
| Marital status n (%)                     |                                                       |                                                        |                                                           |
| Single                                   | 96 (7.9)                                              | 398 (9.2)                                              | 496 (7.3)                                                 |
| Married/Partnered                        | 532 (43.7)                                            | 1957 (45.2)                                            | 2962 (43.4)                                               |
| Divorced/Separated                       | 138 (11.4)                                            | 513 (11.8)                                             | 496 (7.3)                                                 |
| Home alone n (%)                         | 387 (31.9)                                            | 1369 (31.6)                                            | 1957 (28.6)                                               |
| LOS median (IQR)                         | 4.0 (6.1)                                             | 3.7 (5.0)                                              | 2.8 (4.0)                                                 |
| ICU hours mean (SD)                      | 5.9 (37.2)                                            | 3.3 (22.1)                                             | 3.5 (33.4)                                                |
| MET call during admission n<br>(%)       | 91 (7.5)                                              | 274 (6.3)                                              | 475 (6.9)                                                 |
| Complications during<br>admission n (%)  | 707 (24.4)                                            | 1745 (19.7)                                            | 2725 (18.8)                                               |
| Previous health care use<br>median (IQR) | 1.0 (2.0)                                             | 1.0 (2.0)                                              | 0 (1.0)                                                   |
| Malnourished n (%)                       | 172 (38.0)                                            | 514 (33.2)                                             | 632 (28.1)                                                |
| MUST score <sup>a</sup> mean (SD)        | 0.38 (0.48)                                           | 0.33 (0.47)                                            | 0.27 (0.44)                                               |

|                                   |             |             |             |
|-----------------------------------|-------------|-------------|-------------|
| BMI mean (SD)                     | 26.5 (7.3)  | 26.6 (7.6)  | 27.0 (7.4)  |
| Weekend discharge                 | 487 (16.8)  | 1645 (18.6) | 2578 (19.5) |
| Discharge time n (%)              |             |             |             |
| 0600-1200                         | 817 (28.2)  | 2453 (27.7) | 4031 (27.8) |
| 1201-1800                         | 1854 (64.0) | 5811 (65.6) | 8843 (61.0) |
| 1801-0559                         | 226 (7.8)   | 589 (6.7)   | 1629 (11.2) |
| Charlson index mean (SD)          | 2.3 (2.3)   | 2.0 (2.3)   | 1.4 (2.0)   |
| IRSD <sup>b</sup> score mean (SD) | 5.1 (2.8)   | 5.3 (2.7)   | 5.4 (2.9)   |

<sup>a</sup>Higher MUST score indicates worse nutrition status

<sup>b</sup>Higher IRSD score indicates better socioeconomic status

LOS, length of hospital stay; IQR, interquartile range; ICU, intensive care unit SD, standard deviation; MET, medical emergency response team; MUST, malnutrition universal screening tool; BMI, body mass index; IRSD, index of relative socioeconomic disadvantage

### Predictors of early and late readmissions

After adjusted analyses, this study found that higher Charlson index, the number of admissions in the prior 6 months, LOS of index admission and MET calls were associated with higher risk of both early and later readmissions. Similarly, patients who were single, divorced or separated and socially disadvantaged had higher odds of a readmission in both periods (Table 2).

Patients who were malnourished had a 39% higher risk of early readmission (OR 1.39, 95% CI 1.12-1.73) and this risk remained elevated at 23% in later period following discharge (OR 1.23, 95% CI 1.06-1.42). The adjusted subdistribution hazard ratio for readmissions with mortality as a competing risk was 1.17 (95% CI 1.06-1.28) and the CIF curve is shown in Figure 2.

Patients who were discharged over the weekends had a lower odds of being admitted in both early (0.81, 95% 0.74-0.91) and late periods (0.91, 95% 0.84-0.97) following discharge compared to those discharged over the weekdays (Table 2). Patients who were discharged over the weekend were found to have a shorter LOS (median 2.3

(IQR 1.2-4.1) vs. 3.6 (IQR 1.8-6.8,  $p<0.001$ ), fewer nosocomial complications (12.9% vs. 19.3%,  $p<0.001$ ), were less likely to be admitted in the ICU (3.3% vs. 4.9%,  $p<0.001$ ) during index hospitalization and were more likely to be discharged home rather than a residential facility (96.1% vs. 91.2%,  $p<0.001$ ) as compared to those discharged over the weekdays.

### Predictors of early readmissions

Indigenous patients were more likely to be readmitted early after hospital discharge (OR 2.00, 95% CI 1.64-2.45) but early readmissions were less likely among patients who were  $\geq 80$  years of age (OR 0.81, 95% CI 0.70-0.94) (Table 2).

### Predictors of late readmissions

Late readmissions occurred more likely among patients who were living alone at home (OR 1.20, 95% CI 1.08-1.33) but were less often if patient had been admitted to the ICU during index admission (OR 0.70, 95% CI 0.59-0.84) (Table 2).

**Table 2 Multivariable model for early and late readmissions**

| Variable                      | Early Readmissions<br>(0-7 days)<br>Odds ratio (95% CI) <sup>a</sup> | Late Readmissions<br>(8-180 days)<br>Odds ratio (95% CI) |
|-------------------------------|----------------------------------------------------------------------|----------------------------------------------------------|
| Age                           |                                                                      |                                                          |
| ≤40 (reference)               | -                                                                    | -                                                        |
| 41-59                         | 0.90 (0.77-1.05)                                                     | 0.98 (0.89-1.09)                                         |
| 60-79                         | 0.93 (0.80-1.07)                                                     | 1.09 (0.99-1.20)                                         |
| ≥80                           | 0.81 (0.70-0.94)                                                     | 1.01 (0.88-1.70)                                         |
| Male gender                   | 1.07 (0.99-1.16)                                                     | 1.02 (0.96-1.08)                                         |
| Indigenous status             |                                                                      |                                                          |
| Non-indigenous<br>(reference) | -                                                                    | -                                                        |
| Indigenous                    | 2.00 (1.64-2.45)                                                     | 1.06 (0.89-1.26)                                         |
| Marital status                |                                                                      |                                                          |
| Married (reference)           | -                                                                    | -                                                        |
| Single                        | 1.34 (1.04-1.73)                                                     | 1.40 (1.19-1.63)                                         |
| Divorced/Separated            | 1.50 (1.20-1.86)                                                     | 1.54 (1.33-1.78)                                         |

|                                             |                  |                  |
|---------------------------------------------|------------------|------------------|
| Home status                                 |                  |                  |
| Lives with family (reference)               | -                | -                |
| Lives alone                                 | 1.13 (0.96-1.33) | 1.20 (1.08-1.33) |
| Charlson comorbidity index                  | 1.27 (1.24-1.29) | 1.18 (1.16-1.20) |
| Length of stay (index admission, in days)   | 1.02 (1.02-1.03) | 1.01 (1.01-1.02) |
| Admissions in last 6 months (per admission) | 3.20 (2.95-3.50) | 2.93 (2.77-3.10) |
| Socio-economic status <sup>a</sup>          |                  |                  |
| Least disadvantaged (reference)             | -                | -                |
| Most disadvantaged                          | 1.40 (1.22-1.60) | 1.20 (1.10-1.31) |
| Day of discharge                            |                  |                  |
| Weekday (reference)                         | -                | -                |
| Weekend                                     | 0.81 (0.74-0.91) | 0.91 (0.84-0.97) |
| Time of discharge                           |                  |                  |
| AM (0600-1159)                              | 0.99 (0.90-1.09) | 0.96 (0.89-1.02) |
| Reference (1200-1759)                       | -                | -                |
| PM (1801-0559)                              | 1.11 (0.95-1.25) | 0.87 (0.76-1.00) |
| ICU stay during admission                   | 1.03 (0.86-1.07) | 0.70 (0.59-0.84) |
| MET calls during admission                  | 1.30 (1.01-1.70) | 1.27 (1.01-1.17) |
| Complications during admission              | 1.29 (1.16-1.43) | 1.09 (1.11-1.34) |
| BMI during index admission                  | 0.99 (0.98-1.01) | 0.98 (0.97-1.01) |
| MUST class                                  |                  |                  |
| Nourished (reference)                       | -                | -                |
| Malnourished                                | 1.39 (1.12-1.73) | 1.23 (1.06-1.42) |

<sup>a</sup>Odds ratios were derived using a multinomial logistic regression, using readmission category (none within 180 days, early (within 7 days) and late (8-180 days) readmissions as the outcome variable

<sup>b</sup>Socioeconomic status was determined by index of relative socio-economic disadvantage (IRSD)  
CI, confidence interval; ICU, intensive care unit; MET; medical emergency response team; BMI, body mass index; MUST, malnutrition universal screening tool

## Discussion

The results of the present study highlight predictors of readmissions in early and late periods following hospital discharge in the Australian healthcare settings. In line with the previous studies,<sup>3 5 13</sup> we found that higher number of comorbidities, LOS and higher complications during hospital admission were associated with a higher readmission risk. A significant finding of this study is that nutrition status during index admission, predicts both early and late readmissions. Patients who were



1  
2  
3 malnourished during index hospitalization had a 39% higher risk of being readmitted  
4  
5 early after hospital discharge and this risk remains significantly increased even in the  
6  
7 later periods following hospital discharge. Our study validates the findings of a  
8  
9 previous study<sup>10</sup> that impaired nutrition status during index hospitalization increases  
10  
11 the risk of readmissions among medical patients across all specialties. The prevalence  
12  
13 of malnutrition in our study was 31%, which is comparable to other studies among  
14  
15 hospitalized patients.<sup>23</sup> The concerning finding is that only 16% of the patients  
16  
17 underwent nutrition screening during hospital admission, which highlights that a  
18  
19 significant proportion of malnourished patients are missed. Studies indicate that early  
20  
21 nutrition intervention may have a beneficial effect in improving nutritional and  
22  
23 clinical outcomes among malnourished patients.<sup>24 25</sup> Stratton et al in their meta-  
24  
25 analysis involving 1190 patients, found that readmissions rate was significantly  
26  
27 reduced in patients who received oral nutrition supplements (ONS) (33.8% vs. 23.9%,  
28  
29  $p < 0.001$ ).<sup>25</sup> However, the studies involved in this meta-analysis included only older  
30  
31 patients and whether nutrition supplementation can reduce readmissions in younger  
32  
33 patients is still unknown. There is a window of opportunity to target malnutrition  
34  
35 among hospitalized patients and future intervention studies should target patients of  
36  
37 all age groups to see if it helps reduce readmissions.  
38  
39  
40  
41  
42  
43

44 We also found that patients who were discharged on weekends had lower readmission  
45  
46 rates (both in early and late periods following discharge) as compared to those  
47  
48 discharged over the weekdays. One explanation could be that patients who were  
49  
50 considered at a high risk for readmission may already have been selected for weekday  
51  
52 discharge. In addition, this study found that patients discharged on a weekend had a  
53  
54 shorter length of hospital stay, suffered fewer complications during admission and  
55  
56  
57  
58  
59  
60

1  
2  
3 were more likely to be discharged home, suggesting that these patients may have been  
4  
5 less medically complicated. These findings suggest that hospitals need not worry that  
6  
7 weekend discharges will adversely affect their readmission statistics, however, the  
8  
9 results need to be interpreted with caution as patients discharged on weekends were  
10  
11 healthier and less likely to be malnourished. It is also possible that these patients had  
12  
13 fewer post-hospital needs than those discharged over the weekdays. Our study results  
14  
15 are in line with a similar study conducted by Cloyd et al who found lower 30-day  
16  
17 readmission rates in patients discharged over the weekends but this study included  
18  
19 only surgical patients.<sup>26</sup>

20  
21  
22  
23  
24 We found that indigenous status is a strong predictor of early readmissions but not  
25  
26 late readmissions among Australian hospitalized patients. Indigenous Australians are  
27  
28 socially isolated and are among the most disadvantaged groups in Australia.<sup>27</sup> There is  
29  
30 a very high incidence of self-discharge or discharge against medical advice among  
31  
32 indigenous Australians and it is possible that non-resolution of acute illness may be a  
33  
34 contributing factor for early readmissions in this group.<sup>28</sup> We also found that  
35  
36 readmissions were less frequent among very old people. The LOS among patients  
37  
38 older than 80 years was significantly longer in our patients (which could indicate  
39  
40 delayed discharge) and they were more likely to be discharged to a NH rather home,  
41  
42 which could be the reason for their less frequent presentation early after hospital  
43  
44 discharge.  
45  
46  
47  
48  
49

50 With regards to late readmissions, we found that patients living alone are more likely  
51  
52 to be readmitted than those living with family, this finding is in line with previous  
53  
54 studies<sup>29 30</sup> but unlike other studies<sup>11 31</sup> we found that patients who had an ICU  
55  
56  
57  
58  
59  
60

1  
2  
3 admission are less likely to have late readmissions. As ICU admission is a marker of  
4 clinical instability,<sup>32</sup> it is more likely to be associated with an early rather than late  
5 readmission. It is also possible that these patients had a higher mortality after hospital  
6 discharge, which could have been a competing risk for readmissions, and thus had  
7 fewer late readmissions.  
8  
9  
10  
11  
12

13  
14  
15 In conclusion, multiple factors including admission nutrition status predict  
16 rehospitalization. Moreover, this study adds significant evidence that weekend  
17 discharges are not associated with an increased risk of readmissions in medical  
18 patients.  
19  
20  
21  
22  
23  
24  
25  
26  
27

### 28 **Limitations**

29  
30  
31  
32  
33 The results of this study should be interpreted in the context of the data analyzed. Our  
34 preference to compare readmissions within first week to admissions within 8-180  
35 days following discharge, were based on clinical judgment and analysis using an  
36 alternate time period (i.e., 14 days vs. 30 days vs. 90 days) might reveal different  
37 results. This study did not consider other important factors such as functional status  
38 and psychiatric illnesses, which can have a significant impact on unplanned  
39 readmissions. We did not have information about the discharge medications, which  
40 have been shown to be of critical importance and may lead to adverse events after  
41 discharge<sup>33</sup>. Lastly, although this was a large sample, data from only two hospitals  
42 was included, which could limit generalizability. Strengths include large sample size  
43 and inclusion of all readmissions to all hospitals in the state.  
44  
45  
46  
47  
48  
49  
50  
51  
52  
53  
54  
55  
56  
57  
58  
59  
60

## Conclusion

Among patients discharged from hospital, malnutrition as determined by the MUST is a risk factor for both early and late readmissions. There is some indication that early readmissions may have different causal pathways than late readmissions with weekend discharges associated with a significantly lower risk of readmissions.

**Contributors:** YS and CT designed the study and YS, CT, PH and CH carried out the analysis and interpretation. YS and CT lead the study and CH was responsible for data acquisition. YS, PH and CH provided statistical input. YS wrote the manuscript, which was critically reviewed by CT. CT, BK, RS and MM edited the manuscript. All authors approved final manuscript.

**Funding:** This work was supported by Flinders Centre for clinical change and health care research (FCCCHCR) collaboration grant from Flinders University, South Australia (grant number: 36373)

**Competing interests:** None

**Data sharing statement:** The data that support the findings of this study are available from the corresponding author upon reasonable request and only after permission by the Southern Adelaide Clinical Human Research Ethics Committee (SAC HREC).

## References

1. Royal College of Physicians. Hospitals on the Edge? The Time for Action. London: Royal College of Physicians, 2012 [Internet]. 2012. <https://www.rcplondon.ac.uk/guidelines-policy/hospitals-edge-time-action>.
2. Jencks SF, Williams MV, Coleman EA. Rehospitalizations among patients in the Medicare fee-for-service program. *N Engl J Med* 2009;360(14):1418-28.
3. Donze J, Lipsitz S, Bates DW, et al. Causes and patterns of readmissions in patients with common comorbidities: retrospective cohort study. *BMJ* 2013;347:f7171.
4. Bhalla R, Kalkut G. Could Medicare readmission policy exacerbate health care system inequity? *Ann Intern Med* 2010;152(2):114-7.
5. Kansagara D, Englander H, Salanitro A, et al. Risk prediction models for hospital readmission: a systematic review. *JAMA* 2011;306(15):1688-98.
6. Zhou H, Della PR, Roberts P, et al. Utility of models to predict 28-day or 30-day unplanned hospital readmissions: an updated systematic review. *BMJ open* 2016;6(6):e011060.
7. Graham KL, Wilker EH, Howell MD, et al. Differences between early and late readmissions among patients: a cohort study. *Ann Intern Med* 2015;162(11):741-9.
8. Scott IA, Shohag H, Ahmed M. Quality of care factors associated with unplanned readmissions of older medical patients: a case-control study. *Intern Med J* 2014;44(2):161-70.
9. Li JY, Yong TY, Hakendorf P, et al. Identifying risk factors and patterns for unplanned readmission to a general medical service. *Aust Health Rev* 2015;39(1):56-62.
10. Sharma Y, Miller M, Kaambwa B, et al. Malnutrition and its association with readmission and death within 7 days and 8–180 days postdischarge in older patients: a prospective observational study. *BMJ open* 2017;7(11) doi: 10.1136/bmjopen-2017-018443
11. Graham KL, Marcantonio ER. Differences Between Early and Late Readmissions Among Patients. *Ann Intern Med* 2015;163(8):650.
12. Fudim M, O'Connor CM, Dunning A, et al. Aetiology, timing and clinical predictors of early vs. late readmission following index hospitalization for acute heart failure: insights from ASCEND-HF. *Eur J Heart Fail* 2017. doi: 10.1002/ejhf.1020
13. Considine J, Fox K, Plunkett D, et al. Factors associated with unplanned readmissions in a major Australian health service. *Aust Health Rev* 2017 doi: 10.1071/ah16287
14. Kim Y, Gani F, Lucas DJ, et al. Early versus late readmission after surgery among patients with employer-provided health insurance. *Ann Surg* 2015;262(3):502-11.
15. Dharmarajan K, Hsieh AF, Lin Z, et al. Diagnoses and timing of 30-day readmissions after hospitalization for heart failure, acute myocardial infarction, or pneumonia. *JAMA* 2013;309(4):355-63.
16. Lyle G, Hendrie GA, Hendrie D. Understanding the effects of socioeconomic status along the breast cancer continuum in Australian women: a systematic review of evidence. *Int J Equity Health* 2017;16(1):182.

17. Frank M, Sivagnanaratnam A, Bernstein J. Nutritional assessment in elderly care: a MUST! *BMJ Qual Improve Rep* 2015;4(1):u204810. w2031.
18. Sharma Y, Thompson C, Kaambwa B, et al. Validity of the Malnutrition Universal Screening Tool (MUST) in Australian hospitalized acutely unwell elderly patients. *Asia Pac J Clin Nutr* 2017;26(6):994-1000.
19. Noordzij M, Leffondre K, van Stralen KJ, et al. When do we need competing risks methods for survival analysis in nephrology? *Nephrol Dial Transplant* 2013;28(11):2670-7.
20. Verduijn M, Grootendorst DC, Dekker FW, et al. The analysis of competing events like cause-specific mortality--beware of the Kaplan-Meier method. *Nephrol Dial Transplant* 2011;26(1):56-61.
21. Austin PC, Fine JP. Accounting for competing risks in randomized controlled trials: a review and recommendations for improvement. *Stat Med* 2017;36(8):1203-09.
22. Austin PC, Fine JP. Practical recommendations for reporting Fine-Gray model analyses for competing risk data. *Stat Med* 2017;36(27):4391-400.
23. Feinberg J, Nielsen EE, Korang SK, et al. Nutrition support in hospitalised adults at nutritional risk. *Cochrane Database Syst Rev* 2017;5:Cd011598.
24. Sharma Y, Thompson C, Kaambwa B, et al. Investigation of the benefits of early malnutrition screening with telehealth follow up in elderly acute medical admissions. *QJM* 2017 doi: 10.1093/qjmed/hcx095 [published Online First: 2017/05/05]
25. Stratton RJ, Hebuterne X, Elia M. A systematic review and meta-analysis of the impact of oral nutritional supplements on hospital readmissions. *Ageing Res Rev* 2013;12(4):884-97.
26. Cloyd JM, Chen J, Ma Y, et al. Association Between Weekend Discharge and Hospital Readmission Rates Following Major Surgery. *JAMA Surg* 2015;150(9):849-56.
27. Hunter E. Disadvantage and discontent: a review of issues relevant to the mental health of rural and remote Indigenous Australians. *Aust J Rural Health* 2007;15(2):88-93.
28. Yong TY, Fok JS, Hakendorf P, et al. Characteristics and outcomes of discharges against medical advice among hospitalised patients. *Intern Med J* 2013;43(7):798-802.
29. Conroy S, Dowsing T, Reid J, et al. Understanding readmissions: An in-depth review of 50 patients readmitted back to an acute hospital within 30days. *Eur Geriatr Med* 2013;4(1):25-27.
30. Meddings J, Reichert H, Smith SN, et al. The Impact of Disability and Social Determinants of Health on Condition-Specific Readmissions beyond Medicare Risk Adjustments: A Cohort Study. *J Gen Int Med* 2017;32(1):71-80.
31. Hua M, Gong MN, Brady J, et al. Early and late unplanned rehospitalizations for survivors of critical illness\*. *Crit Care Med* 2015;43(2):430-8.
32. Zajic P, Bauer P, Rhodes A, et al. Weekends affect mortality risk and chance of discharge in critically ill patients: a retrospective study in the Austrian registry for intensive care. *Crit Care* 2017;21(1):223.
33. Forster AJ, Murff HJ, Peterson JF, et al. The incidence and severity of adverse events affecting patients after discharge from the hospital. *Ann Intern Med* 2003;138(3):161-7.

1  
2  
3  
4  
5  
6  
7  
8  
9  
10  
11  
12  
13  
14  
15  
16  
17  
18  
19  
20  
21  
22  
23  
24  
25  
26  
27  
28  
29  
30  
31  
32  
33  
34  
35  
36  
37  
38  
39  
40  
41  
42  
43  
44  
45  
46  
47  
48  
49  
50  
51  
52  
53  
54  
55  
56  
57  
58  
59  
60

**Figure 1** Distribution of readmissions

**Figure 2** Cumulative incidence estimate model for readmissions with death as a competing risk. Competing risk regression was used to estimate subdistribution hazard ratio (SHR), 1.17 (95% CI 1.06-1.28). Model adjusted for covariates-age, sex, charlson index and length of hospital stay.

For peer review only

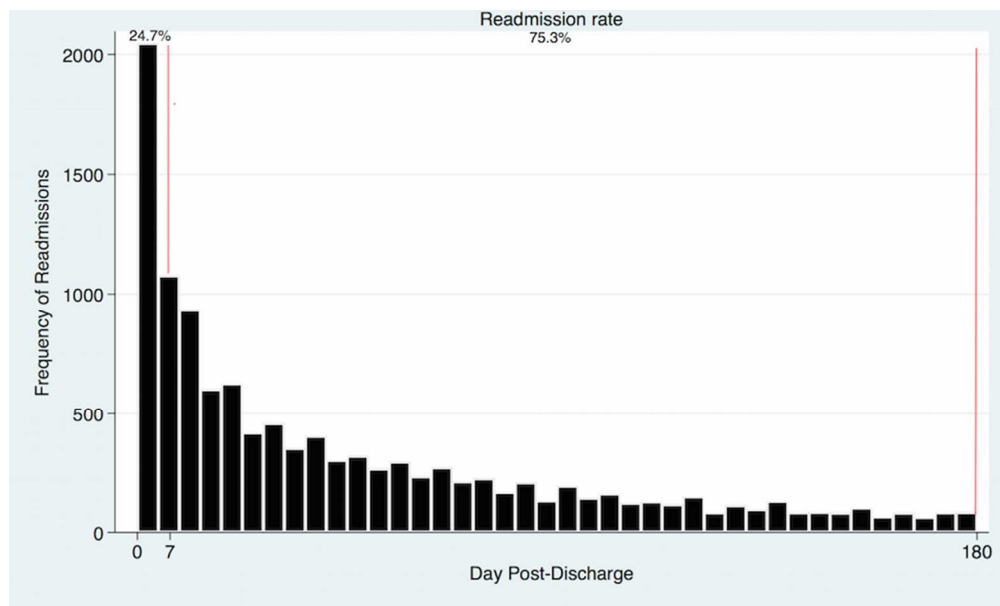

Figure 1 Distribution of readmissions

83x50mm (300 x 300 DPI)

Review only



1  
2  
3  
4  
5  
6  
7  
8  
9  
10  
11  
12  
13  
14  
15  
16  
17  
18  
19  
20  
21  
22  
23  
24  
25  
26  
27  
28  
29  
30  
31  
32  
33  
34  
35  
36  
37  
38  
39  
40  
41  
42  
43  
44  
45  
46  
47  
48  
49  
50  
51  
52  
53  
54  
55  
56  
57  
58  
59  
60

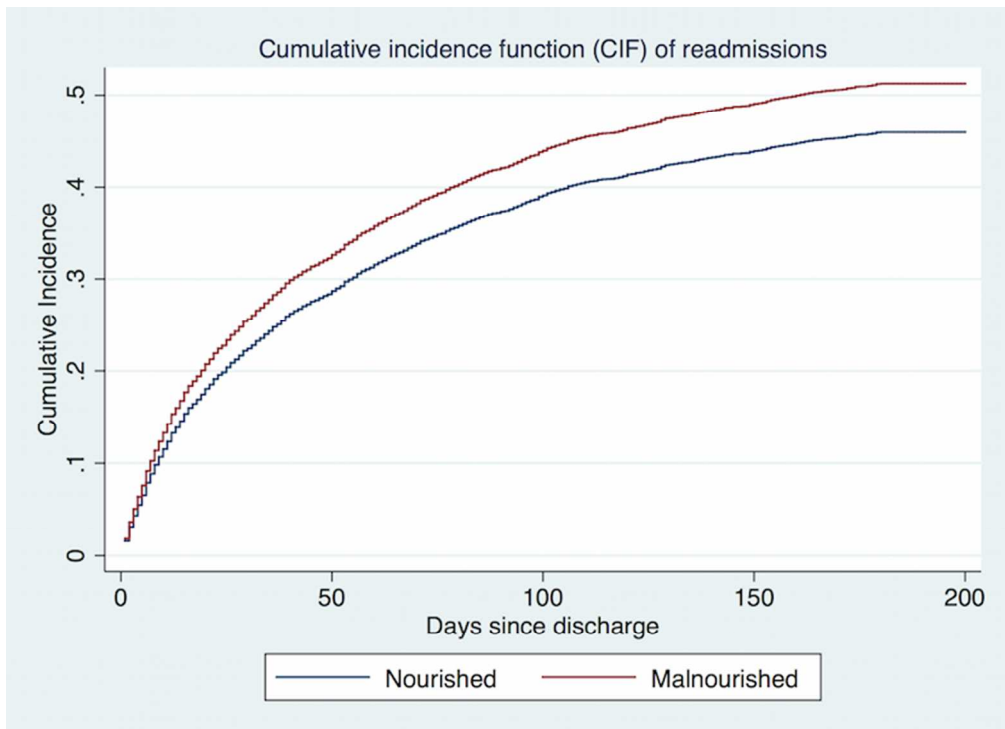

Figure 2 Cumulative incidence estimate model for readmissions with death as a competing risk. Competing risk regression was used to estimate subdistribution hazard ratio (SHR), 1.17 (95% CI 1.06-1.28). Model adjusted for covariates-age, sex, charlson index and length of hospital stay.

70x50mm (300 x 300 DPI)

For peer review only

**STROBE 2007 (v4) Statement—Checklist of items that should be included in reports of *cohort studies***

| Section/Topic            | Item # | Recommendation                                                                                                                                                                       | Reported on page #      |
|--------------------------|--------|--------------------------------------------------------------------------------------------------------------------------------------------------------------------------------------|-------------------------|
| Title and abstract       | 1      | (a) Indicate the study's design with a commonly used term in the title or the abstract                                                                                               | Title page 1 and page 4 |
|                          |        | (b) Provide in the abstract an informative and balanced summary of what was done and what was found                                                                                  | Pages 4-5               |
| <b>Introduction</b>      |        |                                                                                                                                                                                      |                         |
| Background/rationale     | 2      | Explain the scientific background and rationale for the investigation being reported                                                                                                 | Pages 6-7               |
| Objectives               | 3      | State specific objectives, including any prespecified hypotheses                                                                                                                     | Page 7                  |
| <b>Methods</b>           |        |                                                                                                                                                                                      |                         |
| Study design             | 4      | Present key elements of study design early in the paper                                                                                                                              | Pages 7-8               |
| Setting                  | 5      | Describe the setting, locations, and relevant dates, including periods of recruitment, exposure, follow-up, and data collection                                                      | Pages 7-8               |
| Participants             | 6      | (a) Give the eligibility criteria, and the sources and methods of selection of participants. Describe methods of follow-up                                                           | Pages 7-8               |
|                          |        | (b) For matched studies, give matching criteria and number of exposed and unexposed                                                                                                  | N/A                     |
| Variables                | 7      | Clearly define all outcomes, exposures, predictors, potential confounders, and effect modifiers. Give diagnostic criteria, if applicable                                             | Pages 8-9               |
| Data sources/measurement | 8*     | For each variable of interest, give sources of data and details of methods of assessment (measurement). Describe comparability of assessment methods if there is more than one group | Pages 8-9               |
| Bias                     | 9      | Describe any efforts to address potential sources of bias                                                                                                                            | N/A                     |
| Study size               | 10     | Explain how the study size was arrived at                                                                                                                                            | N/A                     |
| Quantitative variables   | 11     | Explain how quantitative variables were handled in the analyses. If applicable, describe which groupings were chosen and why                                                         | Pages 8-9               |
| Statistical methods      | 12     | (a) Describe all statistical methods, including those used to control for confounding                                                                                                | Pages 9-10              |
|                          |        | (b) Describe any methods used to examine subgroups and interactions                                                                                                                  | N/A                     |
|                          |        | (c) Explain how missing data were addressed                                                                                                                                          | N/A                     |
|                          |        | (d) If applicable, explain how loss to follow-up was addressed                                                                                                                       | N/A                     |
|                          |        | (e) Describe any sensitivity analyses                                                                                                                                                | N/A                     |

|                          |     |                                                                                                                                                                                                              |                            |
|--------------------------|-----|--------------------------------------------------------------------------------------------------------------------------------------------------------------------------------------------------------------|----------------------------|
| <b>Results</b>           |     |                                                                                                                                                                                                              |                            |
| Participants             | 13* | (a) Report numbers of individuals at each stage of study—eg numbers potentially eligible, examined for eligibility, confirmed eligible, included in the study, completing follow-up, and analysed            | Pages 10-11, Table 1       |
|                          |     | (b) Give reasons for non-participation at each stage                                                                                                                                                         | N/A                        |
|                          |     | (c) Consider use of a flow diagram                                                                                                                                                                           | N/A information in Table 1 |
| Descriptive data         | 14* | (a) Give characteristics of study participants (eg demographic, clinical, social) and information on exposures and potential confounders                                                                     | Pages 10-11 and Tables 1-2 |
|                          |     | (b) Indicate number of participants with missing data for each variable of interest                                                                                                                          | N/A                        |
|                          |     | (c) Summarise follow-up time (eg, average and total amount)                                                                                                                                                  | N/A                        |
| Outcome data             | 15* | Report numbers of outcome events or summary measures over time                                                                                                                                               | Pages 12-13                |
| Main results             | 16  | (a) Give unadjusted estimates and, if applicable, confounder-adjusted estimates and their precision (eg, 95% confidence interval). Make clear which confounders were adjusted for and why they were included | Pages 11-13, Table 2       |
|                          |     | (b) Report category boundaries when continuous variables were categorized                                                                                                                                    | N/A                        |
|                          |     | (c) If relevant, consider translating estimates of relative risk into absolute risk for a meaningful time period                                                                                             | N/A                        |
| Other analyses           | 17  | Report other analyses done—eg analyses of subgroups and interactions, and sensitivity analyses                                                                                                               | N/A                        |
| <b>Discussion</b>        |     |                                                                                                                                                                                                              |                            |
| Key results              | 18  | Summarise key results with reference to study objectives                                                                                                                                                     | Pages 14-15                |
| <b>Limitations</b>       |     |                                                                                                                                                                                                              |                            |
| Interpretation           | 20  | Give a cautious overall interpretation of results considering objectives, limitations, multiplicity of analyses, results from similar studies, and other relevant evidence                                   | Pages 15-18                |
| Generalisability         | 21  | Discuss the generalisability (external validity) of the study results                                                                                                                                        | Page 17                    |
| <b>Other information</b> |     |                                                                                                                                                                                                              |                            |
| Funding                  | 22  | Give the source of funding and the role of the funders for the present study and, if applicable, for the original study on which the present article is based                                                | Page 18                    |

\*Give information separately for cases and controls in case-control studies and, if applicable, for exposed and unexposed groups in cohort and cross-sectional studies.

1  
2  
3  
4 **Note:** An Explanation and Elaboration article discusses each checklist item and gives methodological background and published examples of transparent reporting. The STROBE  
5 checklist is best used in conjunction with this article (freely available on the Web sites of PLoS Medicine at <http://www.plosmedicine.org/>, Annals of Internal Medicine at  
6 <http://www.annals.org/>, and Epidemiology at <http://www.epidem.com/>). Information on the STROBE Initiative is available at [www.strobe-statement.org](http://www.strobe-statement.org).  
7  
8  
9  
10  
11  
12  
13  
14  
15  
16  
17  
18  
19  
20  
21  
22  
23  
24  
25  
26  
27  
28  
29  
30  
31  
32  
33  
34  
35  
36  
37  
38  
39  
40  
41  
42  
43  
44  
45  
46  
47

For peer review only

# BMJ Open

## Factors influencing early and late readmissions in Australian hospitalised patients and investigating role of admission nutrition status as a predictor of hospital readmissions: a cohort study

|                                 |                                                                                                                                                                                                                                                                                                                                                                                                                                                                                                                                             |
|---------------------------------|---------------------------------------------------------------------------------------------------------------------------------------------------------------------------------------------------------------------------------------------------------------------------------------------------------------------------------------------------------------------------------------------------------------------------------------------------------------------------------------------------------------------------------------------|
| Journal:                        | <i>BMJ Open</i>                                                                                                                                                                                                                                                                                                                                                                                                                                                                                                                             |
| Manuscript ID                   | bmjopen-2018-022246.R1                                                                                                                                                                                                                                                                                                                                                                                                                                                                                                                      |
| Article Type:                   | Research                                                                                                                                                                                                                                                                                                                                                                                                                                                                                                                                    |
| Date Submitted by the Author:   | 22-May-2018                                                                                                                                                                                                                                                                                                                                                                                                                                                                                                                                 |
| Complete List of Authors:       | Sharma, Yogesh; Flinders Medical Centre, General Medicine<br>Miller, Michelle; Flinders University Faculty of Medicine Nursing and Health Sciences, Nutrition & Dietetics<br>Kaambwa, Billingsley; Flinders University Faculty of Medicine Nursing and Health Sciences, Health Economics<br>Shahi, Rashmi; Flinders University Faculty of Medicine Nursing and Health Sciences<br>Hakendorf, Paul; Flinders Medical Centre<br>Horwood, Chris; Flinders Medical Centre<br>Thompson, Campbell; University of Adelaide, Discipline of Medicine |
| <b>Primary Subject Heading</b>: | Epidemiology                                                                                                                                                                                                                                                                                                                                                                                                                                                                                                                                |
| Secondary Subject Heading:      | Nutrition and metabolism, Epidemiology, Public health, Health services research                                                                                                                                                                                                                                                                                                                                                                                                                                                             |
| Keywords:                       | Quality in health care < HEALTH SERVICES ADMINISTRATION & MANAGEMENT, INTERNAL MEDICINE, NUTRITION & DIETETICS, EPIDEMIOLOGY, Health & safety < HEALTH SERVICES ADMINISTRATION & MANAGEMENT                                                                                                                                                                                                                                                                                                                                                 |
|                                 |                                                                                                                                                                                                                                                                                                                                                                                                                                                                                                                                             |

SCHOLARONE™  
Manuscripts

1  
2  
3 **Factors influencing early and late readmissions in Australian hospitalised**  
4 **patients and investigating role of admission nutrition status as a predictor of**  
5 **hospital readmissions: a cohort study**  
6  
7  
8

9 Yogesh Sharma<sup>1</sup>, Michelle Miller<sup>2</sup>, Billingsley Kaambwa<sup>3</sup>, Rashmi Shahi<sup>4</sup>, Paul  
10 Hakendorf<sup>5</sup>, Chris Horwood<sup>6</sup>, Campbell Thompson<sup>7</sup>  
11  
12  
13  
14  
15

16 **Author Affiliations**  
17  
18  
19

20 Dr Yogesh Sharma

21 Consultant Physician

22 Department of General Medicine

23 Flinders Medical Centre, South Australia

24 College of Medicine and Public Health

25 Flinders University, South Australia

26 Tel. +61 8 82046694

27 Fax: +61 8 82046255

28 Email: Yogesh.Sharma@sa.gov.au  
29  
30  
31  
32

33 Prof Michelle Miller

34 Department of Nutrition & Dietetics

35 Flinders University, South Australia

36 Tel: 08 72218855

37 Fax: 08 82046408

38 Email: michelle.miller@flinders.edu.au  
39  
40  
41  
42  
43  
44  
45  
46  
47  
48  
49  
50  
51  
52  
53  
54  
55  
56  
57  
58  
59  
60

1  
2  
3 Assoc Prof Billingsley Kaambwa  
4  
5 Health Economics Unit  
6  
7 Flinders University, South Australia  
8  
9 Tel: +61 8 8201 5377  
10  
11 Fax: +61 8 8275 5377  
12  
13 billingsley.kaambwa@flinders.edu.au  
14  
15

16  
17  
18 Dr Rashmi Shahi  
19  
20 Faculty of Health Sciences  
21  
22 Flinders University, South Australia  
23  
24 Tel. +61423156984  
25  
26 Fax: 08 82046408  
27  
28 Email: shah0103@flinders.edu.au  
29  
30

31  
32  
33 Paul Hakendorf  
34  
35 Clinical Epidemiologist  
36  
37 Department of Clinical Epidemiology  
38  
39 Flinders Medical Centre, South Australia  
40  
41 Tel: +61 8 8204 3950  
42  
43 Email: paul.hakendorf@sa.gov.au  
44  
45  
46  
47

48 Chris Horwood  
49  
50 Clinical Epidemiologist  
51  
52 Department of Clinical Epidemiology  
53  
54 Flinders Medical Centre, South Australia  
55  
56  
57  
58  
59  
60

1  
2  
3 Tel: +61 8 82043179

4  
5 Email: chris.horwood@sa.gov.au  
6  
7

8  
9 Prof Campbell Thompson

10  
11 Discipline of Medicine

12  
13 University of Adelaide, South Australia

14  
15  
16 Tel: +61 8 70740231

17  
18 Email: campbell.thompson@adelaide.edu.au  
19  
20

21  
22 **Corresponding Author**  
23  
24

25  
26 Dr Yogesh Sharma

27  
28 Consultant Physician

29  
30 Department of General Medicine

31  
32 Flinders Medical Centre, South Australia

33  
34 College of Medicine and Public Health

35  
36 Flinders University, South Australia

37  
38 Tel. +61 8 82046694

39  
40 Fax: +61 8 82046255

41  
42 Email: Yogesh.Sharma@sa.gov.au  
43  
44

45  
46  
47  
48 Word count: 2507  
49  
50  
51  
52  
53  
54  
55  
56  
57  
58  
59  
60



## Abstract

**Objectives:** Limited studies have identified predictors of early and late hospital readmissions in Australian healthcare settings. Some of these predictors may be modifiable through targeted interventions. A recent study has identified malnutrition as a predictor of readmissions in older patients but this has not been verified in a larger population. This study investigated what predictors are associated with early and late readmissions and determined whether nutrition status during index hospitalization can be used as a modifiable predictor of unplanned hospital readmissions.

**Design:** A retrospective cohort study

**Setting:** Two tertiary-level hospitals in Australia

**Participants:** All medical admissions  $\geq 18$  years over a period of 1-year

**Outcomes:** Primary objective was to determine predictors of early (0-7 days) and late (8-180 days) readmissions. Secondary objective was to determine whether nutrition status as determined by malnutrition universal screening tool (MUST) can be used to predict readmissions.

**Results:** There were 11,750 (44.8%) readmissions within 6-months, with 2,897 (11%) early and 8,853 (33.8%) late readmissions. MUST was completed in 16.2% patients and prevalence of malnutrition during index admission was 31%. Malnourished

1  
2  
3 patients had a higher risk of both early (OR 1.39, 95% CI 1.12-1.73) and late  
4 readmissions (1.23, 95% CI 1.06-1.28). Weekend discharges were less likely to be  
5 associated with both early (OR 0.81, 95% CI 0.74-0.91) and late readmissions (OR  
6 0.91, 95% CI 0.84-0.97). Indigenous Australians had a higher risk of early  
7 readmissions while those living alone had a higher risk of late readmissions. Patients  
8  
9  
10  
11  
12  
13  
14  
15  
16  
17  
18  
19  
20  
21  
22  
23  
24  
25  
26  
27  
28  
29  
30  
31  
32  
33  
34  
35  
36  
37  
38  
39  
40  
41  
42  
43  
44  
45  
46  
47  
48  
49  
50  
51  
52  
53  
54  
55  
56  
57  
58  
59  
60

≥80 years had a lower risk of early readmissions while admission to intensive care unit (ICU) was associated with a lower risk of late readmissions.

**Conclusions:** Malnutrition is a strong predictor of unplanned readmissions while weekend discharges are less likely to be associated with readmissions. Targeted nutrition intervention may prevent unplanned hospital readmissions.

**Trial registration:** ANZCTR N 12617001362381

### Strengths and limitations

- A large multicentre study involving 19,924 patients with 26,253 admissions.
- Readmissions to all other hospitals were captured.
- Used Cumulative incidence function (CIF) for unbiased estimation of readmissions over time.
- This study did not take into account psychiatric factors and discharge medications.
- Functional status of the patients at discharge was not determined.

## Introduction

Recent advances in medicine have led to a vast improvement in life expectancy but with increasing numbers of patients with multiple clinical problems. Although the length of hospital stay has improved and there has been a decline in the number of beds for acute patients, unplanned hospital readmissions have increased.<sup>1</sup> Hospital readmissions strain the already busy health care settings and not only increase the health care costs but also expose patients to hospitalization associated complications.<sup>2</sup> Medicare data in the US suggests that 20% of patients return to hospital within 30 days of discharge, of which 90% are unplanned admissions with the estimated cost to the extent of US\$30 billion.<sup>3</sup> Given a considerable financial burden for hospitals and adverse outcomes for patients, hospital readmissions are increasingly used as quality indicators for institution's performance benchmark with a risk of reduced reimbursements for poorly performing hospitals.<sup>4</sup>

Although numerous readmission prediction tools are available still preventing readmissions has been problematic, as the discriminative power of the available prediction tools has been modest.<sup>5</sup> Zhou et al has highlighted need for rigorous validation of the existing risk-predictive models for potentially avoidable hospital readmissions, as the performance of the existing models is inconsistent.<sup>6</sup> They have suggested that most of the models were developed based on healthcare data from the USA, which might not be applicable to patients from other settings. Furthermore, different factors may influence readmissions over different periods following hospital discharge.<sup>7</sup> Studies have identified that some of the factors responsible for readmissions e.g. medication errors, may be potentially modifiable and there may be

1  
2  
3 similar other factors which are yet to be identified and could be the target for future  
4 interventions.<sup>8</sup>  
5  
6  
7

8  
9 Very few studies have determined predictors of unplanned readmissions at different  
10 periods following hospital discharge in the Australian health care settings. Moreover,  
11 the available studies have not captured readmissions to all other hospitals following  
12 discharge.<sup>9 10</sup> Malnutrition is associated with adverse health outcomes for patients and  
13 leads to increased health care costs.<sup>11 12</sup> A recent study has suggested that malnutrition  
14 is a strong predictor of hospital readmissions and mortality but this study included  
15 only a small sample of older general medical patients in a single hospital setting.<sup>13</sup>  
16 Whether nutrition risk can be used as a predictor of readmissions in a broad range of  
17 medical patients needs further confirmation. This study was designed to determine  
18 predictors of hospital readmissions in early and late periods following hospital  
19 discharge across all medical specialties, in two major teaching hospitals in Australia  
20 and captured readmissions to all other hospitals. The other aim was to determine  
21 whether admission nutrition status, as determined by the Malnutrition Universal  
22 Screening Tool (MUST), can be used to predict hospital readmissions.  
23  
24  
25  
26  
27  
28  
29  
30  
31  
32  
33  
34  
35  
36  
37  
38  
39  
40

## 41 **Methods**

### 42 **Setting and Study population**

43  
44  
45  
46 This is a retrospective study and data were collected from two large urban teaching  
47 hospitals in South Australia. Ethical approval was granted by Southern Adelaide  
48 Clinical Human Research Ethics Committee (SAC HREC) no. 216.17 on 4 August  
49  
50  
51  
52  
53  
54  
55  
56  
57  
58  
59  
60

1  
2  
3 2017 and this study was registered with Australia and New Zealand clinical trials  
4 registry (ANZCTR N 12617001362381). This study included all live medical  
5 admissions in Flinders Medical Centre (FMC) and Royal Adelaide Hospital (RAH)  
6 from 1 January 2016 to 31 December 2016. For this study, a readmission was only  
7 counted once as a readmission, relative to the prior index admission. All subsequent  
8 admissions then re-entered the cohort as a new index admission. All elective  
9 readmissions were excluded from the dataset.  
10  
11  
12  
13  
14  
15  
16  
17  
18  
19

### 20 **Data sources**

21  
22  
23  
24 In this study, we derived our cohort and variables of interest using the hospital's  
25 central computer database. All the data in the two involved health facilities are  
26 prospectively collected as part of regular hospital operations.  
27  
28  
29  
30  
31  
32

### 33 **Objectives**

34  
35  
36  
37 The primary objective for this study was to determine predictors for early  
38 readmissions, defined as readmissions within 7 days post discharge from index  
39 hospitalization while late readmissions were defined as readmissions within 8-180  
40 days post discharge. The secondary objective was to determine whether nutrition  
41 status as determined by the MUST can predict readmissions and can be used as a  
42 modifiable risk factor. Only non-elective admissions were included in this study.  
43  
44  
45  
46  
47  
48  
49  
50  
51

### 52 **Analysis**

### Variables of interest

Patients were categorized into three groups based upon the pattern of readmission: not readmitted within 180 days (base category), readmitted within 7 days of index admissions (early readmissions) and readmitted within 8 to 180 days after index admission (late readmissions). Patients not readmitted within 180 days were defined as the reference group for subsequent comparisons.

Previous studies have suggested that different variables may be responsible for various stages of readmissions.<sup>14 15</sup> Variables relating to the index admission that may be associated with early readmissions include clinical instability as determined by intensive unit care (ICU) admissions, number of medical emergency response team (MET) calls, complications during admission and length of hospital stay (LOS).<sup>14 16</sup>

Late readmissions may be associated with markers of chronic illness burden as reflected by the Charlson comorbidity illness (CCI), social determinants of health including marital status, whether patient was living alone or with family and the socioeconomic status as determined by the composite index of relative socioeconomic disadvantage (IRSD).<sup>17 18</sup> IRSD relates to the degree of area based social disadvantage based on low levels of income and education and high levels of unemployment and is provided nationally by the Australian Bureau of Statistics.<sup>19</sup>

Nutrition status of the participants during index admission was determined by the use of MUST.<sup>20</sup> It is a requirement that all patients admitted in the RAH and FMC are screened for malnutrition at admission using the MUST. The MUST includes a body mass index (BMI) score, a weight loss score, and an acute disease score and a total MUST score of 0 indicates low risk, 1 medium risk and  $\geq 2$  high risk of malnutrition.<sup>21</sup>

1  
2  
3 For this study, patients with a MUST score of 0 were classified as nourished and  
4 those with a score  $\geq 1$  were classified as malnourished.  
5  
6  
7

### 8 9 **Statistical analysis**

10  
11  
12  
13 Data were assessed for normality using skewness and kurtosis (sk) test. Continuous  
14 variables are presented as mean (standard deviation; SD) while categorical variables  
15 as median (interquartile range; IQR). We used multinomial polytomous logistic  
16 regression to model the association between variables of interest and early and late  
17 readmissions (with no readmissions within 180 days as the reference). LOS was  
18 adjusted for in hospital mortality. The model was adjusted for following covariates-  
19 age, gender and CC1 and LOS.  
20  
21  
22  
23  
24  
25  
26  
27  
28  
29

30  
31 As death is a competing risk for readmissions, the interpretation of Kaplan-Meier  
32 survival curve may not be realistic in clinical practice and may overestimate the  
33 incidence of readmissions over time.<sup>22</sup> Therefore, we used cumulative incidence  
34 functions (CIFs) for unbiased estimation of the probability of readmissions over time  
35 according to the nutrition status of the patients determined during the index  
36 hospitalization.<sup>23 24</sup> Cumulative risk regression model as suggested by Fine and  
37 Gray,<sup>25</sup> determined the subdistribution hazard ratio (SHR) and a CIF curve for  
38 readmissions was plotted. The model was adjusted for the following covariates- age,  
39 gender, CCI and LOS.  
40  
41  
42  
43  
44  
45  
46  
47  
48  
49

50  
51  
52 All data analyses were performed using STATA 15 (StataCorp College station, Texas,  
53 USA) and a p value  $< 0.05$  was considered statistically significant.  
54  
55  
56  
57  
58  
59

## Patient and public involvement

There was no patient or public involvement as this study involved only retrospective data collection.

## Results

There were a total of 26,253 admissions, representing 19,924 patients, between 1<sup>st</sup> January 2016 to 31<sup>st</sup> December 2016, with 52.3% males. The overall readmission rate at 6-months was 44.8%. A total of 2,897 (11.0% of index admissions) patients were readmitted within 7 days of discharge (early readmissions) whereas 8, 853 (33.8% of index admissions) were readmitted within 8-180 days of discharge (late readmissions)(Table 1). The distribution of readmissions by post-discharge day is shown in Figure 1, with 24.7% of readmissions occurring in the early period, and 75.3% occurring late after hospital discharge. MUST was completed in 4251 (16.2%) of patients during index admission and prevalence of malnutrition according to the MUST was 31%. Patients who underwent MUST screening were significantly older (67.8 years (SD 18.4) vs. 66.0 years (SD 18.7),  $P < 0.001$ ), had a higher CCI (1.8 (SD 2.3) vs. 1.7 (SD 2.2),  $P < 0.005$ ) and a longer LOS (5.7 days (IQR 8.7) vs. 3.1 days (IQR 4.5),  $P < 0.001$ ) but were less likely to be of indigenous status (84 (1.8%) vs. 670 (2.8%),  $P < 0.001$ ) than those who missed MUST screening. Majority of patients (80.5%) were discharged over the weekdays and only 19.5% discharges occurred over the weekends.

**Table 1 Initial hospitalization and patient characteristics by readmission status**

| Variable | Early Readmissions<br>(0-7 days)<br>(n = 2897, 11.0%) | Late Readmissions<br>(8-180 days)<br>(n = 8853, 33.8%) | No Readmission<br>(within 180 days)<br>(n = 14503, 55.2%) |
|----------|-------------------------------------------------------|--------------------------------------------------------|-----------------------------------------------------------|
|          |                                                       |                                                        |                                                           |



|                                       |             |             |             |
|---------------------------------------|-------------|-------------|-------------|
| Age n (%)                             |             |             |             |
| <40                                   | 305 (10.5)  | 863 (9.8)   | 1616 (11.1) |
| 41- 59                                | 664 (22.9)  | 1869 (21.1) | 3156 (21.8) |
| 60 - 79                               | 1189 (41.0) | 3525 (39.8) | 5343 (36.8) |
| >80                                   | 739 (25.5)  | 2596 (29.3) | 4388 (30.3) |
| Sex Male n (%)                        | 1588 (54.8) | 4688 (53.0) | 7528 (52.0) |
| Confirmed Indigenous status n (%)     | 169 (5.8)   | 249 (2.8)   | 329 (2.3)   |
| Marital status n (%)                  |             |             |             |
| Single                                | 96 (7.9)    | 398 (9.2)   | 496 (7.3)   |
| Married/Partnered                     | 532 (43.7)  | 1957 (45.2) | 2962 (43.4) |
| Divorced/Separated                    | 138 (11.4)  | 513 (11.8)  | 496 (7.3)   |
| Home alone n (%)                      | 387 (31.9)  | 1369 (31.6) | 1957 (28.6) |
| LOS median (IQR)                      | 4.0 (6.1)   | 3.7 (5.0)   | 2.8 (4.0)   |
| ICU hours mean (SD)                   | 5.9 (37.2)  | 3.3 (22.1)  | 3.5 (33.4)  |
| MET call during admission n (%)       | 91 (7.5)    | 274 (6.3)   | 475 (6.9)   |
| Complications during admission n (%)  | 707 (24.4)  | 1745 (19.7) | 2725 (18.8) |
| Previous health care use median (IQR) | 1.0 (2.0)   | 1.0 (2.0)   | 0 (1.0)     |
| Malnourished n (%)                    | 172 (37.6)  | 514 (33.2)  | 632 (28.1)  |
| MUST score <sup>a</sup> mean (SD)     | 0.38 (0.48) | 0.33 (0.47) | 0.27 (0.44) |
| MUST group <sup>b</sup> n (%)         |             |             |             |
| Low risk                              | 286 (62.4)  | 1033 (66.8) | 1614 (71.9) |
| Medium risk                           | 65 (14.2)   | 205 (13.2)  | 252 (11.2)  |
| High risk                             | 107 (23.4)  | 309 (20.0)  | 380 (16.9)  |
| BMI mean (SD)                         | 26.5 (7.3)  | 26.6 (7.6)  | 27.0 (7.4)  |
| Weekend discharge                     | 487 (16.8)  | 1645 (18.6) | 2578 (19.5) |
| Discharge time n (%)                  |             |             |             |
| 0600-1200                             | 817 (28.2)  | 2453 (27.7) | 4031 (27.8) |
| 1201-1800                             | 1854 (64.0) | 5811 (65.6) | 8843 (61.0) |
| 1801-0559                             | 226 (7.8)   | 589 (6.7)   | 1629 (11.2) |
| Charlson index mean (SD)              | 2.3 (2.3)   | 2.0 (2.3)   | 1.4 (2.0)   |
| IRSD <sup>c</sup> score mean (SD)     | 5.1 (2.8)   | 5.3 (2.7)   | 5.4 (2.9)   |

<sup>a</sup>Higher MUST score indicates worse nutrition status

<sup>b</sup>MUST group, Low risk = MUST score 0, Medium risk = MUST score 1, High risk = MUST score  $\geq 2$

<sup>c</sup>Higher IRSD score indicates better socioeconomic status

LOS, length of hospital stay; IQR, interquartile range; ICU, intensive care unit SD, standard deviation; MET, medical emergency response team; MUST, malnutrition universal screening tool; BMI, body mass index; IRSD, index of relative socioeconomic disadvantage

## Predictors of early and late readmissions

After adjusted analyses, this study found that higher Charlson index, the number of admissions in the prior 6 months, LOS of index admission and MET calls were associated with higher risk of both early and later readmissions. Similarly, patients

1  
2  
3 who were single, divorced or separated and socially disadvantaged had higher odds of  
4  
5 a readmission in both periods (Table 2).  
6  
7

8  
9 Patients who were malnourished had a 39% higher risk of early readmission (OR  
10  
11 1.39, 95% CI 1.12-1.73) and this risk remained elevated at 23% in later period  
12  
13 following discharge (OR 1.23, 95% CI 1.06-1.42). The adjusted subdistribution  
14  
15 hazard ratio for readmissions with mortality as a competing risk was 1.17 (95% CI  
16  
17 1.06-1.28) and the CIF curve is shown in Figure 2.  
18  
19

20  
21  
22 Patients who were discharged over the weekends had a lower odds of being admitted  
23  
24 in both early 0.81, 95% 0.74-0.91) and late periods (0.91, 95% 0.84-0.97) following  
25  
26 discharge compared to those discharged over the weekdays (Table 2). Patients who  
27  
28 were discharged over the weekend were found to have a shorter LOS (median 2.3  
29  
30 (IQR 1.2-4.1) vs. 3.6 (IQR 1.8-6.8,  $p<0.001$ ), fewer nosocomial complications (12.9%  
31  
32 vs. 19.3%,  $p<0.001$ ), were less likely to be admitted in the ICU (3.3% vs. 4.9%,  
33  
34  $p<0.001$ ) during index hospitalization and were more likely to be discharged home  
35  
36 rather than a residential facility (96.1% vs. 91.2%,  $p<0.001$ ) as compared to those  
37  
38 discharged over the weekdays.  
39  
40  
41  
42  
43

#### 44 **Predictors of early readmissions**

45  
46  
47

48 Indigenous patients were more likely to be readmitted early after hospital discharge  
49  
50 (OR 2.00, 95% CI 1.64-2.45) but early readmissions were less likely among patients  
51  
52 who were  $\geq 80$  years of age (OR 0.81, 95% CI 0.70-0.94) (Table 2).  
53  
54  
55  
56  
57  
58  
59  
60

## Predictors of late readmissions

Late readmissions occurred more likely among patients who were living alone at home (OR 1.20, 95% CI 1.08-1.33) but were less often if patient had been admitted to the ICU during index admission (OR 0.70, 95% CI 0.59-0.84) (Table 2).

**Table 2 Multivariable model for early and late readmissions**

| Variable                         | Early Readmissions<br>(0-7 days)<br>Odds ratio (95% CI) <sup>a</sup> | Late Readmissions<br>(8-180 days)<br>Odds ratio (95% CI) |
|----------------------------------|----------------------------------------------------------------------|----------------------------------------------------------|
| Age                              |                                                                      |                                                          |
| ≤40 (reference)                  | -                                                                    | -                                                        |
| 41-59                            | 0.90 (0.77-1.05)                                                     | 0.98 (0.89-1.09)                                         |
| 60-79                            | 0.93 (0.80-1.07)                                                     | 1.09 (0.99-1.20)                                         |
| ≥80                              | 0.81 (0.70-0.94)                                                     | 1.01 (0.88-1.70)                                         |
| Male gender                      | 1.07 (0.99-1.16)                                                     | 1.02 (0.96-1.08)                                         |
| Indigenous status                |                                                                      |                                                          |
| Non-indigenous<br>(reference)    | -                                                                    | -                                                        |
| Indigenous                       | 2.00 (1.64-2.45)                                                     | 1.06 (0.89-1.26)                                         |
| Marital status                   |                                                                      |                                                          |
| Married (reference)              | -                                                                    | -                                                        |
| Single                           | 1.34 (1.04-1.73)                                                     | 1.40 (1.19-1.63)                                         |
| Divorced/Separated               | 1.50 (1.20-1.86)                                                     | 1.54 (1.33-1.78)                                         |
| Home status                      |                                                                      |                                                          |
| Lives with family<br>(reference) | -                                                                    | -                                                        |
| Lives alone                      | 1.13 (0.96-1.33)                                                     | 1.20 (1.08-1.33)                                         |
| Charlson comorbidity             | 1.27 (1.24-1.29)                                                     | 1.18 (1.16-1.20)                                         |

|                                             |                  |                  |
|---------------------------------------------|------------------|------------------|
| index                                       |                  |                  |
| Length of stay (index admission, in days)   | 1.02 (1.02-1.03) | 1.01 (1.01-1.02) |
| Admissions in last 6 months (per admission) | 3.20 (2.95-3.50) | 2.93 (2.77-3.10) |
| Socio-economic status <sup>a</sup>          |                  |                  |
| Least disadvantaged (reference)             | -                | -                |
| Most disadvantaged                          | 1.40 (1.22-1.60) | 1.20 (1.10-1.31) |
| Day of discharge                            |                  |                  |
| Weekday (reference)                         | -                | -                |
| Weekend                                     | 0.81 (0.74-0.91) | 0.91 (0.84-0.97) |
| Time of discharge                           |                  |                  |
| AM (0600-1159)                              | 0.99 (0.90-1.09) | 0.96 (0.89-1.02) |
| Reference (1200-1759)                       | -                | -                |
| PM (1801-0559)                              | 1.11 (0.95-1.25) | 0.87 (0.76-1.00) |
| ICU stay during admission                   | 1.03 (0.86-1.07) | 0.70 (0.59-0.84) |
| MET calls during admission                  | 1.30 (1.01-1.70) | 1.27 (1.01-1.17) |
| Complications during admission              | 1.29 (1.16-1.43) | 1.09 (1.11-1.34) |
| BMI during index admission                  | 0.99 (0.98-1.01) | 0.98 (0.97-1.01) |
| MUST class                                  |                  |                  |
| Nourished (reference)                       | -                | -                |
| Malnourished                                | 1.39 (1.12-1.73) | 1.23 (1.06-1.42) |

<sup>a</sup>Odds ratios were derived using a multinomial logistic regression, using readmission category (none within 180 days, early (within 7 days) and late (8-180 days) readmissions as the outcome variable

<sup>b</sup>Socioeconomic status was determined by index of relative socio-economic disadvantage (IRSD)

CI, confidence interval; ICU, intensive care unit; MET; medical emergency response team; BMI, body mass index;

MUST, malnutrition universal screening tool

## Discussion

The results of the present study highlight predictors of readmissions in early and late periods following hospital discharge in the Australian healthcare settings. In line with the previous studies,<sup>3 5 16</sup> we found that higher number of comorbidities, LOS and higher complications during hospital admission were associated with a higher readmission risk. A significant finding of this study is that nutrition status during index admission, predicts both early and late readmissions. Patients who were malnourished during index hospitalization had a 39% higher risk of being readmitted early after hospital discharge and this risk remains significantly increased even in the later periods following hospital discharge. Our study validates the findings of a previous study<sup>13</sup> that impaired nutrition status during index hospitalization increases the risk of readmissions among medical patients across all specialties. The prevalence of malnutrition in our study was 31%, which is comparable to other studies among hospitalized patients.<sup>26</sup> The concerning finding is that only 16% of the patients underwent nutrition screening during hospital admission, which highlights that a significant proportion of malnourished patients are missed. Studies indicate that early nutrition intervention may have a beneficial effect in improving nutritional and clinical outcomes among malnourished patients.<sup>27 28</sup> Stratton et al in their meta-analysis involving 1190 patients, found that readmissions rate was significantly reduced in patients who received oral nutrition supplements (ONS) (33.8% vs. 23.9%,  $p < 0.001$ ).<sup>28</sup> However, the studies involved in this meta-analysis included only older

1  
2  
3 patients and whether nutrition supplementation can reduce readmissions in younger  
4  
5 patients is still unknown. There is a window of opportunity to target malnutrition  
6  
7 among hospitalized patients and future intervention studies should target patients of  
8  
9 all age groups to see if it helps reduce readmissions.  
10

11  
12  
13 We also found that patients who were discharged on weekends had lower readmission  
14  
15 rates (both in early and late periods following discharge) as compared to those  
16  
17 discharged over the weekdays. One explanation could be that patients who were  
18  
19 considered at a high risk for readmission may already have been selected for weekday  
20  
21 discharge. In addition, this study found that patients discharged on a weekend had a  
22  
23 shorter length of hospital stay, suffered fewer complications during admission and  
24  
25 were more likely to be discharged home, suggesting that these patients may have been  
26  
27 less medically complicated. These findings suggest that hospitals need not worry that  
28  
29 weekend discharges will adversely affect their readmission statistics, however, the  
30  
31 results need to be interpreted with caution as patients discharged on weekends were  
32  
33 healthier and less likely to be malnourished. It is also possible that these patients had  
34  
35 fewer post-hospital needs than those discharged over the weekdays. Our study results  
36  
37 are in line with a similar study conducted by Cloyd et al who found lower 30-day  
38  
39 readmission rates in patients discharged over the weekends but this study included  
40  
41 only surgical patients.<sup>29</sup>  
42  
43  
44  
45  
46  
47

48 We found that indigenous status is a strong predictor of early readmissions but not  
49  
50 late readmissions among Australian hospitalized patients. Indigenous Australians are  
51  
52 socially isolated and are among the most disadvantaged groups in Australia.<sup>30</sup> There is  
53  
54 a very high incidence of self-discharge or discharge against medical advice among  
55  
56  
57  
58  
59  
60

1  
2  
3 indigenous Australians and it is possible that non-resolution of acute illness may be a  
4 contributing factor for early readmissions in this group.<sup>31</sup> We also found that  
5 readmissions were less frequent among very old people. The LOS among patients  
6 older than 80 years was significantly longer in our patients (which could indicate  
7 delayed discharge) and they were more likely to be discharged to a NH rather home,  
8 which could be the reason for their less frequent presentation early after hospital  
9 discharge.  
10  
11  
12  
13  
14  
15  
16  
17  
18  
19

20 With regards to late readmissions, we found that patients living alone are more likely  
21 to be readmitted than those living with family, this finding is in line with previous  
22 studies<sup>32,33</sup> but unlike other studies<sup>14,34</sup> we found that patients who had an ICU  
23 admission are less likely to have late readmissions. As ICU admission is a marker of  
24 clinical instability,<sup>35</sup> it is more likely to be associated with an early rather than late  
25 readmission. It is also possible that these patients had a higher mortality after hospital  
26 discharge, which could have been a competing risk for readmissions, and thus had  
27 fewer late readmissions.  
28  
29  
30  
31  
32  
33  
34  
35  
36  
37  
38  
39

40 In conclusion, multiple factors including admission nutrition status predict  
41 rehospitalization. Moreover, this study adds significant evidence that weekend  
42 discharges are not associated with an increased risk of readmissions in medical  
43 patients.  
44  
45  
46  
47  
48  
49  
50  
51  
52

### 53 **Limitations**

54  
55  
56  
57  
58  
59  
60

1  
2  
3 The results of this study should be interpreted in the context of the data analyzed. Our  
4 preference to compare readmissions within first week to admissions within 8-180  
5 days following discharge, were based on clinical judgment and analysis using an  
6 alternate time period (i.e., 14 days vs. 30 days vs. 90 days) might reveal different  
7 results. This study did not consider other important factors such as functional status  
8 and psychiatric illnesses, which can have a significant impact on unplanned  
9 readmissions. We did not have information about the discharge medications, which  
10 have been shown to be of critical importance and may lead to adverse events after  
11 discharge<sup>8</sup>. Lastly, although this was a large sample, data from only two hospitals was  
12 included, which could limit generalizability. Strengths include large sample size and  
13 inclusion of all readmissions to all hospitals in the state.  
14  
15  
16  
17  
18  
19  
20  
21  
22  
23  
24  
25  
26  
27  
28

### 29 **Conclusion**

30  
31  
32  
33 Among patients discharged from hospital, malnutrition as determined by the MUST is  
34 a risk factor for both early and late readmissions There is some indication that early  
35 readmissions may have different causal pathways than late readmissions with  
36 weekend discharges associated with a significantly lower risk of readmissions.  
37  
38  
39  
40  
41  
42  
43

44 **Contributors:** YS and CT designed the study and YS, CT, PH and CH carried out the  
45 analysis and interpretation. YS and CT lead the study and CH was responsible for  
46 data acquisition. YS, PH and CH provided statistical input. YS wrote the manuscript,  
47 which was critically reviewed by CT. CT, BK, RS and MM edited the manuscript.  
48  
49  
50  
51 All authors approved final manuscript.  
52  
53  
54  
55  
56  
57  
58  
59  
60



1  
2  
3 **Funding:** This work was supported by Flinders Centre for clinical change and health  
4 care research (FCCCHCR) collaboration grant from Flinders University, South  
5 Australia (grant number: 36373)  
6  
7  
8  
9

10  
11 **Competing interests:** None  
12  
13

14  
15 **Data sharing statement:** The data that support the findings of this study are available  
16 from the corresponding author upon reasonable request and only after permission by  
17 the Southern Adelaide Clinical Human Research Ethics Committee (SAC HREC).  
18  
19  
20  
21  
22

## 23 **References**

- 24  
25  
26  
27  
28  
29 1. Royal College of Physicians. Hospitals on the Edge? The Time for Action. London:  
30 Royal College of Physicians, 2012 [Internet]. 2012.  
31 <https://www.rcplondon.ac.uk/guidelines-policy/hospitals-edge-time-action>.  
32  
33  
34 2. Jencks SF, Williams MV, Coleman EA. Rehospitalizations among patients in the  
35 Medicare fee-for-service program. *N Engl J Med* 2009;360(14):1418-28.  
36  
37 3. Donze J, Lipsitz S, Bates DW, et al. Causes and patterns of readmissions in patients  
38 with common comorbidities: retrospective cohort study. *BMJ* 2013;347:f7171.  
39  
40 4. Bhalla R, Kalkut G. Could Medicare readmission policy exacerbate health care  
41 system inequity? *Ann Intern Med* 2010;152(2):114-7.  
42  
43 5. Kansagara D, Englander H, Salanitro A, et al. Risk prediction models for hospital  
44 readmission: a systematic review. *JAMA* 2011;306(15):1688-98.  
45  
46  
47  
48  
49  
50  
51  
52  
53  
54  
55  
56  
57  
58  
59  
60

- 1  
2  
3 6. Zhou H, Della PR, Roberts P, et al. Utility of models to predict 28-day or 30-day  
4  
5 unplanned hospital readmissions: an updated systematic review. *BMJ open*  
6  
7 2016;6(6):e011060.  
8
- 9  
10 7. Graham KL, Wilker EH, Howell MD, et al. Differences between early and late  
11  
12 readmissions among patients: a cohort study. *Ann Intern Med*  
13  
14 2015;162(11):741-9.  
15
- 16  
17 8. Forster AJ, Murff HJ, Peterson JF, et al. The incidence and severity of adverse  
18  
19 events affecting patients after discharge from the hospital. *Ann Intern Med*  
20  
21 2003;138(3):161-7.  
22  
23
- 24  
25 9. Scott IA, Shohag H, Ahmed M. Quality of care factors associated with unplanned  
26  
27 readmissions of older medical patients: a case-control study. *Intern Med J*  
28  
29 2014;44(2):161-70.  
30
- 31  
32 10. Li JY, Yong TY, Hakendorf P, et al. Identifying risk factors and patterns for  
33  
34 unplanned readmission to a general medical service. *Aust Health Rev*  
35  
36 2015;39(1):56-62.  
37
- 38  
39 11. Lim SL, Ong KC, Chang YH, et al. Malnutrition and its impact on cost of  
40  
41 hospitalization, length of stay, readmission and 3-year mortality. *Clin Nutr*  
42  
43 2012;31(3):345-50  
44
- 45  
46 12. Barker LA, Gout BS, Crowe TC. Hospital malnutrition: prevalence, identification  
47  
48 and impact on patients and the healthcare system. *Int J Environ Res Public*  
49  
50 *Health* 2011;8(2):514-27  
51
- 52  
53 13. Sharma Y, Miller M, Kaambwa B, et al. Malnutrition and its association with  
54  
55 readmission and death within 7 days and 8–180 days postdischarge in older  
56  
57  
58  
59  
60

- 1  
2  
3 patients: a prospective observational study. *BMJ open* 2017;7(11) doi:  
4 10.1136/bmjopen-2017-018443  
5  
6  
7 14. Graham KL, Marcantonio ER. Differences Between Early and Late Readmissions  
8  
9 Among Patients. *Ann Intern Med* 2015;163(8):650.  
10  
11 15. Fudim M, O'Connor CM, Dunning A, et al. Aetiology, timing and clinical  
12  
13 predictors of early vs. late readmission following index hospitalization for  
14  
15 acute heart failure: insights from ASCEND-HF. *Eur J Heart Fail* 2017. doi:  
16  
17 10.1002/ejhf.1020  
18  
19  
20 16. Considine J, Fox K, Plunkett D, et al. Factors associated with unplanned  
21  
22 readmissions in a major Australian health service. *Aust Health Rev* 2017 doi:  
23  
24 10.1071/ah16287  
25  
26  
27 17. Kim Y, Gani F, Lucas DJ, et al. Early versus late readmission after surgery among  
28  
29 patients with employer-provided health insurance. *Ann Surg* 2015;262(3):502-  
30  
31 11.  
32  
33 18. Dharmarajan K, Hsieh AF, Lin Z, et al. Diagnoses and timing of 30-day  
34  
35 readmissions after hospitalization for heart failure, acute myocardial  
36  
37 infarction, or pneumonia. *JAMA* 2013;309(4):355-63.  
38  
39  
40 19. Lyle G, Hendrie GA, Hendrie D. Understanding the effects of socioeconomic  
41  
42 status along the breast cancer continuum in Australian women: a systematic  
43  
44 review of evidence. *Int J Equity Health* 2017;16(1):182.  
45  
46  
47 20. Frank M, Sivagnanaratnam A, Bernstein J. Nutritional assessment in elderly care:  
48  
49 a MUST! *BMJ Qual Improve Rep* 2015;4(1):u204810. w2031.  
50  
51 21. Sharma Y, Thompson C, Kaambwa B, et al. Validity of the Malnutrition  
52  
53 Universal Screening Tool (MUST) in Australian hospitalized acutely unwell  
54  
55 elderly patients. *Asia Pac J Clin Nutr* 2017;26(6):994-1000.  
56  
57  
58  
59  
60

- 1  
2  
3 22. Noordzij M, Leffondre K, van Stralen KJ, et al. When do we need competing risks  
4 methods for survival analysis in nephrology? *Nephrol Dial Transplant*  
5 2013;28(11):2670-7.  
6  
7  
8  
9 23. Verduijn M, Grootendorst DC, Dekker FW, et al. The analysis of competing  
10 events like cause-specific mortality--beware of the Kaplan-Meier method.  
11 *Nephrol Dial Transplant* 2011;26(1):56-61.  
12  
13  
14  
15 24. Austin PC, Fine JP. Accounting for competing risks in randomized controlled  
16 trials: a review and recommendations for improvement. *Stat Med*  
17 2017;36(8):1203-09.  
18  
19  
20  
21 25. Austin PC, Fine JP. Practical recommendations for reporting Fine-Gray model  
22 analyses for competing risk data. *Stat Med* 2017;36(27):4391-400.  
23  
24  
25  
26 26. Feinberg J, Nielsen EE, Korang SK, et al. Nutrition support in hospitalised adults  
27 at nutritional risk. *Cochrane Database Syst Rev* 2017;5:Cd011598.  
28  
29  
30  
31 27. Sharma Y, Thompson C, Kaambwa B, et al. Investigation of the benefits of early  
32 malnutrition screening with telehealth follow up in elderly acute medical  
33 admissions. *QJM* 2017 doi: 10.1093/qjmed/hcx095 [published Online First:  
34 2017/05/05]  
35  
36  
37  
38  
39 28. Stratton RJ, Hebuterne X, Elia M. A systematic review and meta-analysis of the  
40 impact of oral nutritional supplements on hospital readmissions. *Ageing Res*  
41 *Rev* 2013;12(4):884-97.  
42  
43  
44  
45 29. Cloyd JM, Chen J, Ma Y, et al. Association Between Weekend Discharge and  
46 Hospital Readmission Rates Following Major Surgery. *JAMA Surg*  
47 2015;150(9):849-56.  
48  
49  
50  
51  
52  
53  
54  
55  
56  
57  
58  
59  
60

- 1  
2  
3 30. Hunter E. Disadvantage and discontent: a review of issues relevant to the mental  
4 health of rural and remote Indigenous Australians. *Aust J Rural Health*  
5 2007;15(2):88-93.  
6  
7  
8  
9 31. Yong TY, Fok JS, Hakendorf P, et al. Characteristics and outcomes of discharges  
10 against medical advice among hospitalised patients. *Intern Med J*  
11 2013;43(7):798-802.  
12  
13  
14  
15 32. Conroy S, Dowsing T, Reid J, et al. Understanding readmissions: An in-depth  
16 review of 50 patients readmitted back to an acute hospital within 30days. *Eur*  
17 *Geriatr Med* 2013;4(1):25-27.  
18  
19  
20  
21 33. Meddings J, Reichert H, Smith SN, et al. The Impact of Disability and Social  
22 Determinants of Health on Condition-Specific Readmissions beyond Medicare  
23 Risk Adjustments: A Cohort Study. *J Gen Int Med* 2017;32(1):71-80.  
24  
25  
26  
27 34. Hua M, Gong MN, Brady J, et al. Early and late unplanned rehospitalizations for  
28 survivors of critical illness\*. *Crit Care Med* 2015;43(2):430-8.  
29  
30  
31  
32 35. Zajic P, Bauer P, Rhodes A, et al. Weekends affect mortality risk and chance of  
33 discharge in critically ill patients: a retrospective study in the Austrian registry  
34 for intensive care. *Crit Care* 2017;21(1):223.  
35  
36  
37  
38  
39  
40  
41  
42  
43  
44  
45  
46  
47  
48  
49  
50  
51  
52  
53  
54  
55  
56  
57  
58  
59  
60

**Figure 1** Distribution of readmissions

**Figure 2** Cumulative incidence estimate model for readmissions with death as a competing risk. Competing risk regression was used to estimate subdistribution hazard ratio (SHR), 1.17 (95% CI 1.06-1.28). Model adjusted for covariates-age, sex, charlson index and length of hospital stay.

1  
2  
3  
4  
5  
6  
7  
8  
9  
10  
11  
12  
13  
14  
15  
16  
17  
18  
19  
20  
21  
22  
23  
24  
25  
26  
27  
28  
29  
30  
31  
32  
33  
34  
35  
36  
37  
38  
39  
40  
41  
42  
43  
44  
45  
46  
47  
48  
49  
50  
51  
52  
53  
54  
55  
56  
57  
58  
59  
60

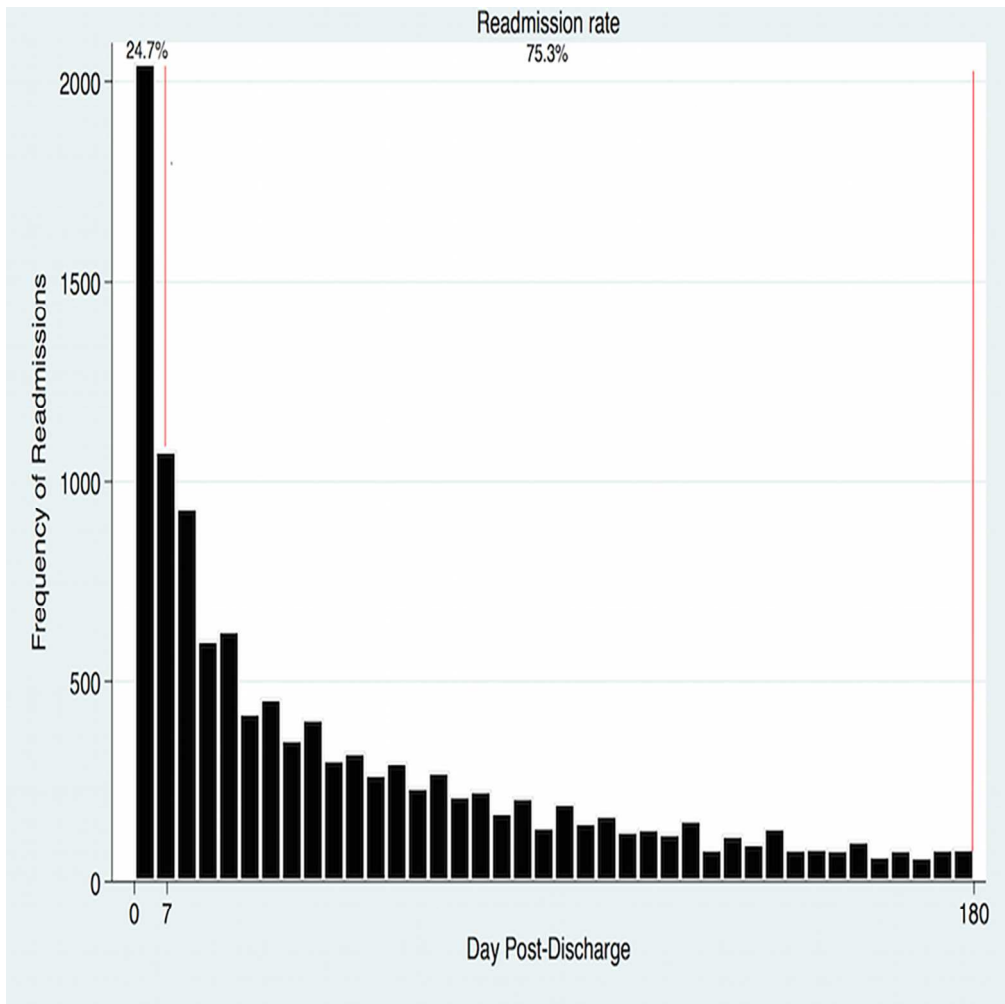

Figure 1 Distribution of readmissions

90x90mm (300 x 300 DPI)

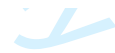

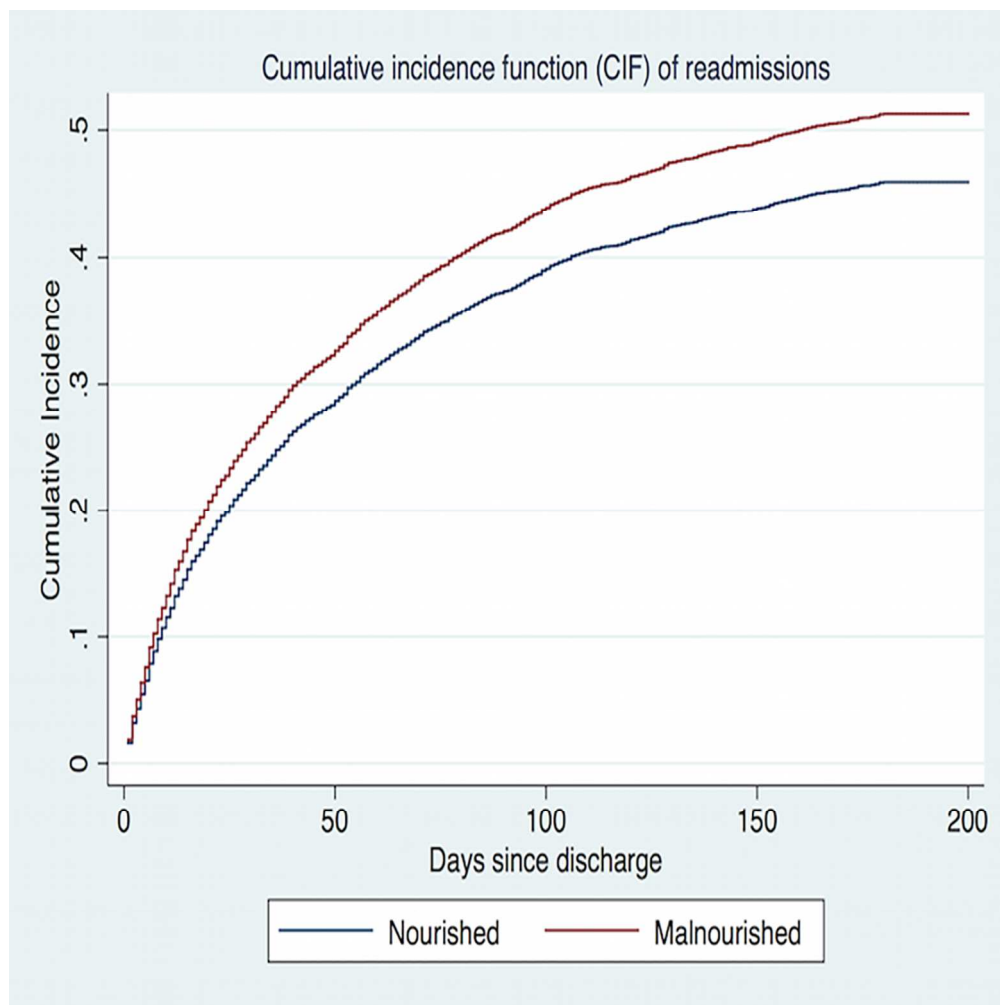

Figure 2 Cumulative incidence estimate model for readmissions with death as a competing risk. Competing risk regression was used to estimate subdistribution hazard ratio (SHR), 1.17 (95% CI 1.06-1.28). Model adjusted for covariates-age, sex, charlson index and length of hospital stay.

90x90mm (300 x 300 DPI)

**STROBE 2007 (v4) Statement—Checklist of items that should be included in reports of *cohort studies***

| Section/Topic             | Item # | Recommendation                                                                                                                                                                       | Reported on page #      |
|---------------------------|--------|--------------------------------------------------------------------------------------------------------------------------------------------------------------------------------------|-------------------------|
| Title and abstract        | 1      | (a) Indicate the study’s design with a commonly used term in the title or the abstract                                                                                               | Title page 1 and page 4 |
|                           |        | (b) Provide in the abstract an informative and balanced summary of what was done and what was found                                                                                  | Pages 4-5               |
| <b>Introduction</b>       |        |                                                                                                                                                                                      |                         |
| Background/rationale      | 2      | Explain the scientific background and rationale for the investigation being reported                                                                                                 | Pages 6-7               |
| Objectives                | 3      | State specific objectives, including any prespecified hypotheses                                                                                                                     | Page 7                  |
| <b>Methods</b>            |        |                                                                                                                                                                                      |                         |
| Study design              | 4      | Present key elements of study design early in the paper                                                                                                                              | Pages 7-8               |
| Setting                   | 5      | Describe the setting, locations, and relevant dates, including periods of recruitment, exposure, follow-up, and data collection                                                      | Pages 7-8               |
| Participants              | 6      | (a) Give the eligibility criteria, and the sources and methods of selection of participants. Describe methods of follow-up                                                           | Pages 7-8               |
|                           |        | (b) For matched studies, give matching criteria and number of exposed and unexposed                                                                                                  | N/A                     |
| Variables                 | 7      | Clearly define all outcomes, exposures, predictors, potential confounders, and effect modifiers. Give diagnostic criteria, if applicable                                             | Pages 8-9               |
| Data sources/ measurement | 8*     | For each variable of interest, give sources of data and details of methods of assessment (measurement). Describe comparability of assessment methods if there is more than one group | Pages 8-9               |
| Bias                      | 9      | Describe any efforts to address potential sources of bias                                                                                                                            | N/A                     |
| Study size                | 10     | Explain how the study size was arrived at                                                                                                                                            | N/A                     |
| Quantitative variables    | 11     | Explain how quantitative variables were handled in the analyses. If applicable, describe which groupings were chosen and why                                                         | Pages 8-9               |
| Statistical methods       | 12     | (a) Describe all statistical methods, including those used to control for confounding                                                                                                | Pages 9-10              |
|                           |        | (b) Describe any methods used to examine subgroups and interactions                                                                                                                  | N/A                     |
|                           |        | (c) Explain how missing data were addressed                                                                                                                                          | N/A                     |
|                           |        | (d) If applicable, explain how loss to follow-up was addressed                                                                                                                       | N/A                     |
|                           |        | (e) Describe any sensitivity analyses                                                                                                                                                | N/A                     |



| <b>Results</b>           |     |                                                                                                                                                                                                              |                            |
|--------------------------|-----|--------------------------------------------------------------------------------------------------------------------------------------------------------------------------------------------------------------|----------------------------|
| Participants             | 13* | (a) Report numbers of individuals at each stage of study—eg numbers potentially eligible, examined for eligibility, confirmed eligible, included in the study, completing follow-up, and analysed            | Pages 10-11, Table 1       |
|                          |     | (b) Give reasons for non-participation at each stage                                                                                                                                                         | N/A                        |
|                          |     | (c) Consider use of a flow diagram                                                                                                                                                                           | N/A information in Table 1 |
| Descriptive data         | 14* | (a) Give characteristics of study participants (eg demographic, clinical, social) and information on exposures and potential confounders                                                                     | Pages 10-11 and Tables 1-2 |
|                          |     | (b) Indicate number of participants with missing data for each variable of interest                                                                                                                          | N/A                        |
|                          |     | (c) Summarise follow-up time (eg, average and total amount)                                                                                                                                                  | N/A                        |
| Outcome data             | 15* | Report numbers of outcome events or summary measures over time                                                                                                                                               | Pages 12-13                |
| Main results             | 16  | (a) Give unadjusted estimates and, if applicable, confounder-adjusted estimates and their precision (eg, 95% confidence interval). Make clear which confounders were adjusted for and why they were included | Pages 11-13, Table 2       |
|                          |     | (b) Report category boundaries when continuous variables were categorized                                                                                                                                    | N/A                        |
|                          |     | (c) If relevant, consider translating estimates of relative risk into absolute risk for a meaningful time period                                                                                             | N/A                        |
| Other analyses           | 17  | Report other analyses done—eg analyses of subgroups and interactions, and sensitivity analyses                                                                                                               | N/A                        |
| <b>Discussion</b>        |     |                                                                                                                                                                                                              |                            |
| Key results              | 18  | Summarise key results with reference to study objectives                                                                                                                                                     | Pages 14-15                |
| <b>Limitations</b>       |     |                                                                                                                                                                                                              |                            |
| Interpretation           | 20  | Give a cautious overall interpretation of results considering objectives, limitations, multiplicity of analyses, results from similar studies, and other relevant evidence                                   | Pages 15-18                |
| Generalisability         | 21  | Discuss the generalisability (external validity) of the study results                                                                                                                                        | Page 17                    |
| <b>Other information</b> |     |                                                                                                                                                                                                              |                            |
| Funding                  | 22  | Give the source of funding and the role of the funders for the present study and, if applicable, for the original study on which the present article is based                                                | Page 18                    |

\*Give information separately for cases and controls in case-control studies and, if applicable, for exposed and unexposed groups in cohort and cross-sectional studies.

1  
2  
3  
4  
5  
6  
7  
8  
9  
10  
11  
12  
13  
14  
15  
16  
17  
18  
19  
20  
21  
22  
23  
24  
25  
26  
27  
28  
29  
30  
31  
32  
33  
34  
35  
36  
37  
38  
39  
40  
41  
42  
43  
44  
45  
46  
47

**Note:** An Explanation and Elaboration article discusses each checklist item and gives methodological background and published examples of transparent reporting. The STROBE checklist is best used in conjunction with this article (freely available on the Web sites of PLoS Medicine at <http://www.plosmedicine.org/>, Annals of Internal Medicine at <http://www.annals.org/>, and Epidemiology at <http://www.epidem.com/>). Information on the STROBE Initiative is available at [www.strobe-statement.org](http://www.strobe-statement.org).

For peer review only
